1                   **Effects of Equine-Assisted Therapy on Recovery after Stroke –**  
2                                           **A Systematic Review**

3  
4                                           Bettina Hanna Trunk\*, Alireza Gharabaghi\*

5  
6  
7                   Institute for Neuromodulation and Neurotechnology, University Hospital and  
8                                           University of Tübingen, Tuebingen, Germany

9  
10                                           \*Correspondence

11                   Institute for Neuromodulation and Neurotechnology, University Hospital and  
12                   University of Tuebingen, Otfried-Mueller-Str.45, 72076 Tuebingen, Germany.  
13                   Telephone: +49 7071 29-85197. Email addresses: [bettina.trunk@uni-tuebingen.de](mailto:bettina.trunk@uni-tuebingen.de),  
14                                           [alireza.gharabaghi@uni-tuebingen.de](mailto:alireza.gharabaghi@uni-tuebingen.de)

15 **Abstract**

16 *Background* Equine-Assisted Therapy (EAT) can boost well-being and recovery of  
17 patients with neurological or psychiatric disorders.

18 *Objective* The goal of this systematic review is to gain a better understanding of the  
19 effects of EAT on recovery after stroke.

20 *Methods* A systematic literature search was performed in the following databases:  
21 PubMed, Web of Science and Scopus. Furthermore, reference lists from the articles  
22 included were screened. English-written articles published between 2000-2023 that  
23 reported on health-related effects of EAT (applied with both horses and riding  
24 simulators) on stroke recovery in patients aged between 18 and 85 were included.  
25 Methodological quality was assessed by the Mixed Methods Appraisal Tool.

26 *Results* Following the screening of 2030 and retrieval of 33 articles respectively, 14  
27 studies were included in this systematic review (437 patients, mean age range: 40 –  
28 70 years). Since several of these studies lacked important methodological information,  
29 the overall methodological quality varied. Thirteen studies reported physical findings  
30 (balance, gait, postural coordination, activities of daily living, lower extremity motor  
31 impairment, motor function and hand strength), and seven studies reported further  
32 health-related outcomes (cognition, quality of life, depression and perception of the  
33 intervention, muscle thickness and trunk muscle activity). The findings suggest positive  
34 effects of EAT on stroke recovery in different health-related outcomes, whereas the  
35 most consistent beneficial effects were reported for balance and gait.

36 *Conclusion* EAT appears to be a promising multimodal intervention for the recovery of  
37 different functions after stroke. However, evidence is sparse and methodological

38 quality limited. Future research should investigate the effects of EAT on stroke  
39 recovery more systematically.

40

41 **Key words (max. 6)**

42 Equine-Assisted Therapy, Hippotherapy, Therapeutic Horse Riding, Stroke, Recovery,  
43 Multimodal Intervention

## 44 **Introduction**

45 One out of four people over the age of 25 are expected to suffer from a stroke within  
46 their lifetime. (Feigin *et al.*, 2022) Stroke is a devastating disease which can lead to  
47 various, severe, and persistent symptoms, such as hemiparesis of the upper and lower  
48 extremity, spasticity, aphasia, and other cognitive impairments. (Brewer *et al.*, 2013)  
49 Due to natural reorganization processes, patients can, to some extent, recover lost  
50 functions within the first six months following a stroke. However, after this period, no  
51 further recovery is expected with current therapies. (Murphy and Corbett, 2009;  
52 Grefkes and Ward, 2014) Persistent disabilities have a drastic impact on the patients'  
53 quality of life, as they are often dependent on caregivers, even for simple activities of  
54 daily life. (Kim *et al.*, 1999; Feigin *et al.*, 2015) Thus, novel interventions are required.  
55 (*Achten et al.*, 2012)

56 Multimodal interventions, such as Equine-Assisted Therapy (EAT), have been  
57 proposed to engage patients in concurrent physical, sensory, cognitive and social  
58 activities, therefore supporting recovery from multiple symptoms. (Pekna *et al.*, 2012,  
59 Bunketorp-Käll *et al.*, 2017b) While riding a horse at walking speed, the three-  
60 dimensional movement of the horse's back leads to a rhythmic sensorimotor  
61 stimulation of the patients that is comparable to human gait. (Uchiyama *et al.*, 2011;  
62 Garner and Rigby, 2015, Bunketorp-Käll *et al.*, 2017b; Guindos-Sanchez *et al.*, 2020)  
63 At around 70-100 steps/minute, the rider is passively moved. (Uchiyama *et al.*, 2011)  
64 Patients must therefore constantly adjust to small postural changes. (Rigby and  
65 Grandjean, 2016) EAT can be performed with both horses and riding simulators. (Baek  
66 and Kim, 2014, Bunketorp-Käll *et al.*, 2017b) The former in particular provides an  
67 enriched environment, ultimately leading to a higher training motivation and improved

68 psychological outcome. (Bunketorp-Käll *et al.*, 2017b; Vive *et al.*, 2022; Ward *et al.*,  
69 2022)

70 While the exact mechanisms of action have not been understood yet, several theories  
71 have been suggested in this regard. (Lewis, 2020) For example, the similarity of  
72 sensorimotor stimulation during EAT and human gait has been suggested to  
73 strengthen the muscles of the rider, ultimately leading to improvements in gait. (Beinotti  
74 *et al.*, 2013; Lewis, 2020) Furthermore, the rider needs to continuously adjust to the  
75 horses' movement (McGibbon *et al.*, 2009; Uchiyama *et al.*, 2011; Garner and Rigby,  
76 2015, Bunketorp-Käll *et al.*, 2017b; Guindos-Sanchez *et al.*, 2020) which may train  
77 their vestibular system and postural control, ultimately improving their balance. (de  
78 Mello *et al.*, 2022) Moreover, the horses' girth may lead to a stretch of adductor  
79 muscles of hips and legs and decrease spasticity. (McGibbon *et al.*, 2009)  
80 Furthermore, horses have a higher body temperature than humans which may also  
81 lead to decreased spasticity and hypertonicity. (Lewis, 2020)

82 Benefits of EAT following severe neurological disability or illness have previously been  
83 reported (Viruega *et al.*, 2022); usually in children with cerebral palsy (Deutz *et al.*,  
84 2018; Guindos-Sanchez *et al.*, 2020; Heussen and Häusler, 2022), but also in patients  
85 with multiple sclerosis (Stergiou *et al.*, 2017), spinal cord injury (Lechner *et al.*, 2007),  
86 ADHD (Hyun *et al.*, 2016; Yoo *et al.*, 2016), chronic pain (Collado-Mateo *et al.*, 2020),  
87 Down syndrome (Portaro *et al.*, 2020), cancer (Viruega *et al.*, 2023), or stroke (Beinotti  
88 *et al.*, 2013, Bunketorp-Käll *et al.*, 2017b). EAT was found to benefit physical function,  
89 i.e., improved gait, balance, or gross motor function, as well as to decrease spasticity.  
90 (Guindos-Sanchez *et al.*, 2020; Badin *et al.*, 2022) In addition, psychological factors,  
91 such as quality of life and depression were found to be improved in various cohorts.  
92 (Badin *et al.*, 2022; Viruega *et al.*, 2023)

93 Consequently, EAT appears to be a promising multimodal intervention that may  
94 facilitate recovery of multiple symptoms in stroke patients. (Bunketorp-Käll *et al.*,  
95 2017b) In addition, EAT provides a much higher training intensity than other  
96 interventions. This has been proposed to be vital for boosting further recovery in  
97 chronic stroke patients (Krakauer *et al.*, 2012; Lohse *et al.*, 2014; Solomonow-Avnon  
98 and Mawase, 2019; Ward *et al.*, 2019). However, previous research of EAT in stroke  
99 patients is sparse and, to the best of our knowledge, no systematic review has yet  
100 synthesized the effects of EAT on different domains of stroke recovery yet. Moreover,  
101 it remains unclear whether the effects differ when EAT is applied with horses or riding  
102 simulators.

103 We therefore aim to 1) provide an overview of the existing literature on EAT in stroke  
104 patients; 2) evaluate the methodological quality of these studies; 3) synthesize the  
105 effects of EAT on health-related outcomes during recovery after stroke and; 4) assess  
106 the differences in outcome when applying EAT with horses or riding simulators.

## 107 **Methods**

108 This systematic review was conducted in accordance with the Physiotherapy Evidence  
109 Database (PRISMA) guidelines (Page *et al.*, 2021) as well as the guidelines for  
110 synthesis without meta-analysis (SWiM) (Campbell *et al.*, 2020). This review was not  
111 registered. Data search, extraction, synthesis, and quality assessment were done by  
112 one reviewer (BHT).

### 113 ***Eligibility criteria***

114 Inclusion criteria were defined based on the PICO approach (population, intervention,  
115 control, outcome).

116 The patient population of interest were stroke patients between 18 and 80 years of  
117 age. We included intervention studies published between 2000 and 2023 in which EAT  
118 had been applied (independent of the precise intervention) in both horses and riding  
119 simulators. Furthermore, studies that included different patient cohorts were taken into  
120 consideration only if they were mainly comprised of stroke patients. Moreover, we took  
121 only those studies into account in which health-related outcomes (i.e., in physical,  
122 psychological, and physiological domains) were investigated. We did not consider  
123 manuscripts in any language other than English, conference work, theses, case  
124 reports, and study protocols.

### 125 ***Search strategy***

126 A search between January 1, 2000, and May 2, 2023 was conducted in the PubMed,  
127 Web of Science and Scopus databases. Furthermore, reference lists were cross-  
128 checked for potentially missed studies. Our search included search terms related to  
129 EAT and stroke and were connected using Boolean operators. The complete syntax  
130 for each library can be found in Supplemental Material.

131 ***Selection process***

132 All search results were downloaded to Mendeley with title, authors and abstract.  
133 Duplicates were then removed. Titles and abstracts were screened for eligibility. Full-  
134 text copies of the relevant studies were then downloaded and screened for eligibility.

135 ***Data extraction***

136 The following data were extracted from the studies selected: publication characteristics  
137 (authors, year, and location), aim of the study, study characteristics (age, sample size,  
138 time since stroke), intervention (details of experimental and control group, and dose of  
139 treatment), outcome measures, general findings. The data was organized in an Excel  
140 spreadsheet and labelled according to the health domain of interest.

141 ***Data Synthesis***

142 Results were then qualitatively synthesized. For synthesis, data was sorted regarding  
143 the study design (RCT and NRT) and then sorted regarding studies that applied the  
144 intervention in horses and in simulators. We furthermore investigated and synthesized  
145 results of physical and other health-related effects. If there was sufficient data for  
146 specific outcomes, harvest plots were created in order to assess heterogeneity of the  
147 data and to synthesize findings.

148 Within- and between group effects were furthermore described. For this, Cohen's d  
149 effect sizes and respective 95% Confidence Intervals (CI) were computed (see Table  
150 1). For within-group effects, i.e., changes over time (pre- to post-intervention), the  
151 timepoints immediately before and after the intervention or the nearest post timepoint  
152 were chosen. To account for differences in the direction of the scales, mean differences  
153 were multiplied by -1 for scales in which a higher number represents a better outcome.  
154 Therefore, positive effect sizes describe either favorable within-effects over time or



155 between-effects for the experimental group (EG) compared to the control group (CG).  
156 Effects sizes (ES) of  $d = 0.10 - 0.30$  were interpreted as small, of  $d = 0.30 - 0.50$  as  
157 moderate, and of greater than 0.5 as large (Goulet-Pelletier and Cousineau, 2020).

### 158 **Quality assessment**

159 The quality of the included studies was assessed using the Mixed Methods Appraisal  
160 Tool (MMAT) version 2018. (Hong *et al.*, 2018) This tool was designed for evaluating  
161 the quality of studies that used mixed methods (randomized controlled trials, non-  
162 randomized trials, quantitative descriptive studies, and mixed methods studies) to be  
163 included in systematic reviews based on five quality criteria. (Hong *et al.*, 2018) Criteria  
164 that were met were scored by a “Y”, whereas those that were not met were scored with  
165 a “N” or a “U” in the event of missing information. No studies were excluded based on  
166 their methodological quality.

## 167 Results

### 168 Study selection

169 Our systematic literature yielded 3107 articles. Then, 1077 duplicates were removed.  
170 After screening, 1996 articles were excluded, and 33 articles were retrieved and  
171 checked for eligibility. 17 articles met the inclusion criteria. As four reports reported  
172 outcomes from the same study (Bunketorp-Käll *et al.*, 2017b, 2019, 2020), we included  
173 14 studies in this review (Fig. 1). The studies involved are summarized in Tab. 1.

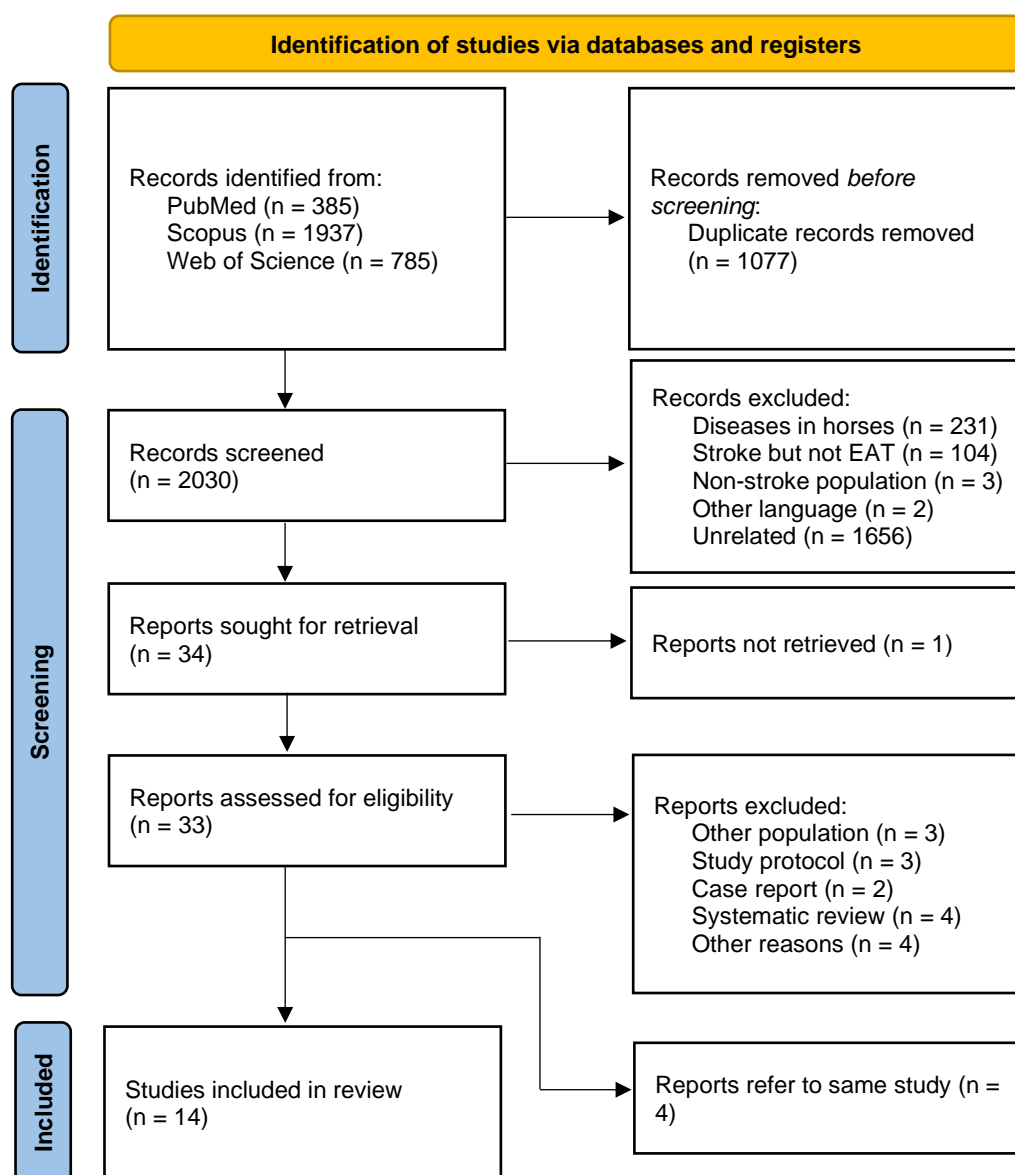

**Fig. 1. Flow diagram of enrolment based on PRISMA guidelines.**

**Tab. 1. Overview of the studies included.** This overview was sorted regarding the study design (RCT, NRT and Qualitative Study) and whether the intervention was applied with a horse or riding simulator. For each study, outcomes are sorted regarding the health-domain, i.e., physical, and other health-related outcomes.

<sup>1</sup>Findings from data of one study. <sup>2</sup>Study included a second experimental condition.  
\*Significant effect reported in paper.

Abbreviations: A = Affected, ADL = Activities of daily living, BBS = Berg Balance Scale, BDL-BS = Bäckstrand, Dahlberg and Liljenäs Balance Scale, BDI = Becks Depression Inventory, BDL-BS = Bäckstrand, Dahlberg and Liljenäs Balance Scale, B-POMA = Balance Part of Performance Oriented Mobility Assessment, CG = control group, CNSD = Central Nervous System Developmental, COP = Center of Pressure, DRP = Discrete relative phases, EAT = Equine-Assisted Therapy, EC = eyes closed, EG = experimental group, EMG = Electromyography, EO = eyes open, EO muscle = External Oblique muscle, FAC = Functional Ambulation Category Scale, FGA = Functional Gait Assessment, FMLE = Fugl-Meyer Lower Extremity Scale, G-POMA = Gait part of Performance Oriented Mobility Assessment, HAM = Hamilton Depression Rating Scale, KAT = Kinesthetic Ability Trainer, IO = Internal Oblique, LE = Lower Extremity, LH = Left Hand, MBI = Modified Barthel Index, M-MAS = Modified Motor Assessment Scale according to Uppsala University Hospital, NA = Non-Affected, NRT = Non-randomized Trial, POMA = Performance-Oriented Mobility Assessment, QoL = Quality of Life, RCT = Randomized Controlled, RH = Right Hand, SF-36 = Medical Outcomes Study 36-item Short-Form health survey, SIS-9 = Stroke Impact Scale - Item 9, TIS = Trunk Impairment Scale, TrA = Transversus Abdominis, TUGT = Timed Up and Go Test, 10 mWT = Timed 10-meter walk test, 6 MWT = The six-minute walk test

| Study, Location and Study Design                           | Patient population                                                                      | Intervention                                                                                        |                                                                                 | Outcome domain                                                                                                                  | Assessed Function                                                                                                                                                                                                     | Outcome Measure                                                                                                                                                                                                                     | ES (95% CI) - within                                                                                                                                                                                                                                                                     | ES (95% CI) - between                                                                                                                                                                                                                                                                      |
|------------------------------------------------------------|-----------------------------------------------------------------------------------------|-----------------------------------------------------------------------------------------------------|---------------------------------------------------------------------------------|---------------------------------------------------------------------------------------------------------------------------------|-----------------------------------------------------------------------------------------------------------------------------------------------------------------------------------------------------------------------|-------------------------------------------------------------------------------------------------------------------------------------------------------------------------------------------------------------------------------------|------------------------------------------------------------------------------------------------------------------------------------------------------------------------------------------------------------------------------------------------------------------------------------------|--------------------------------------------------------------------------------------------------------------------------------------------------------------------------------------------------------------------------------------------------------------------------------------------|
|                                                            | Age since stroke                                                                        | N Experimental Dose                                                                                 | N Control Dose                                                                  |                                                                                                                                 |                                                                                                                                                                                                                       |                                                                                                                                                                                                                                     |                                                                                                                                                                                                                                                                                          |                                                                                                                                                                                                                                                                                            |
| <b>RCT, Horse</b>                                          |                                                                                         |                                                                                                     |                                                                                 |                                                                                                                                 |                                                                                                                                                                                                                       |                                                                                                                                                                                                                                     |                                                                                                                                                                                                                                                                                          |                                                                                                                                                                                                                                                                                            |
| Beinotti <i>et al.</i> , 2013<br>Brazil                    | 59 years (EG) and 52 years (CG)<br><br>>1 year post stroke                              | N=12<br>Conventional therapy + EAT<br><br>3 times/week, 16 weeks, 50min/session plus 30min EAT/week | N=12<br>Conventional therapy alone<br><br>3 times/week, 16 weeks, 50min/session | Other                                                                                                                           | QoL                                                                                                                                                                                                                   | SF-36                                                                                                                                                                                                                               | ES could not be calculated for complete scale (data not available)<br><br>*Significant between-group difference reported                                                                                                                                                                 | ES could not be calculated for complete scale (data not available)<br><br>*Significant between-group difference reported                                                                                                                                                                   |
| Bunketorp-Käll <i>et al.</i> , 2017 <sup>1</sup><br>Sweden | 62.6±6.5 years (EG) and 63.7±6.7 years (CG)<br><br>≥10 months and ≤5 years after stroke | N=41<br>Horse-riding + interaction with horse<br><br>2 times/week, 12 weeks, 240min/session         | N=41<br>Continuation of standard therapy <sup>2</sup>                           | Physical<br>Physical<br>Physical<br>Physical<br>Physical<br>Physical<br>Physical<br>Physical<br>Other<br><br>Other<br><br>Other | Balance<br>Balance<br>Gait<br>Hand Strength RH<br>Hand Strength RH<br>Hand Strength RH<br>Hand Strength LH<br>Hand Strength LH<br>Hand Strength LH<br>Perception of Recovery<br>Cognitive Level<br><br>Working Memory | BBS<br>BDL-BS<br>TUGT<br>Gripit max<br>Gripit mean<br>Gripit final<br>Gripit max<br>Gripit mean<br>Gripit final<br>SIS-9<br><br>Barrow Neurological Institute screen for higher cerebral functions<br>Letter-number sequencing test | 0.78 (0.33 – 1.23)*<br>0.89 (0.44 – 1.35)*<br>0.48 (0.04 – 0.91)*<br>0.16 (-0.27 – 0.60)<br>0.25 (-0.19 – 0.68)<br>0.26 (-0.17 – 0.70)<br>0.16 (-0.27 – 0.60)<br>0.20 (-0.23 – 0.64)<br>0.08 (-0.36 – 0.51)<br>0.78 (0.33 – 1.23)*<br><br>0.30 (-0.13 – 0.74)<br><br>0.17 (-0.26 – 0.61) | 0.63 (0.18 – 1.07)*<br>0.11 (-0.33 – 0.55)*<br>0.39 (-0.06 – 0.82)*<br>0.24 (-0.19 – 0.68)<br>0.18 (-0.25 – 0.62)<br>0.13 (-0.30 – 0.56)<br>0.19 (-0.24 – 0.63)<br>0.23 (-0.20 – 0.67)<br>0.07 (-0.36 – 0.51)<br>0.95 (0.49 – 1.40)*<br><br>0.16 (-0.27 – 0.60)<br><br>0.11 (-0.32 – 0.54) |
| Bunketorp-Kall <i>et al.</i> , 2019 <sup>1</sup>           |                                                                                         |                                                                                                     |                                                                                 | Physical<br>Physical<br>Physical<br>Physical<br>Physical                                                                        | Gait<br>Gait<br>Gait<br>Gait<br>Motor function                                                                                                                                                                        | 10 mWT [sec]<br>10 mWT [n steps]<br>10 mWT [m]<br>6 MWT<br>M-MAS AUS                                                                                                                                                                | 0.31 (-0.13 – 0.74)*<br>0.45 (0.00 – 0.88)*<br>0.47 (0.02 – 0.90)<br>0.68 (0.19 – 1.15)<br>0.34 (-0.10 – 0.77)*                                                                                                                                                                          | 0.08 (-0.36 – 0.51)*<br>0.27 (-0.17 – 0.70)*<br>0.42 (-0.02 – 0.85)<br>0.43 (-0.05 – 0.89)<br>0.23 (-0.20 – 0.66)*                                                                                                                                                                         |

| Study, Location and Study Design                 | Patient population                                                  | Intervention                                                                                                                    |                                                                                                                                            | Outcome domain                                                            | Assessed Function                                                                                                                                            | Outcome Measure                                                                                                                              | ES (95% CI) - within                                                                                                                                                                           | ES (95% CI) - between                                                                                |
|--------------------------------------------------|---------------------------------------------------------------------|---------------------------------------------------------------------------------------------------------------------------------|--------------------------------------------------------------------------------------------------------------------------------------------|---------------------------------------------------------------------------|--------------------------------------------------------------------------------------------------------------------------------------------------------------|----------------------------------------------------------------------------------------------------------------------------------------------|------------------------------------------------------------------------------------------------------------------------------------------------------------------------------------------------|------------------------------------------------------------------------------------------------------|
| Bunketorp-Käll <i>et al.</i> , 2020 <sup>1</sup> |                                                                     |                                                                                                                                 |                                                                                                                                            | Other                                                                     | Association perceived recovery and actual recovery (Correlation: changes of clinical scales and SIS-9)                                                       | M-MAS UAS<br>BBS<br>TUGT<br>10 mWT (self-selected)<br>10 mWT (fast)                                                                          | <i>Spearman-correlation</i><br>r = 0.13, p = .40<br>r = 0.25, p = .12<br>r = -0.04, p = .81<br>r = -0.41, p = .001<br>r = -0.38, p = .02                                                       | N/A                                                                                                  |
| Lee <i>et al.</i> , 2014<br>Korea                | 63.8±6.2 (EG)<br>and 64.3±4.8 (CG)<br><br>Not specified             | N=15<br><br>Horse riding training<br><br>3 days/week,<br>8 weeks,<br>30min/session                                              | N=15<br><br>Treadmill Training<br><br>3 days/week,<br>8 weeks,<br>30min/session                                                            | Physical<br>Physical<br>Physical                                          | Balance<br>Gait (Gait Analyzer)<br>Gait (Gait Analyzer)                                                                                                      | BBS<br>Gait velocity<br>Step length asymmetry                                                                                                | 0.92 (0.17 - 1.67)*<br>2.06 (1.17 - 2.94)*<br>2.60 (1.63 - 3.57)*                                                                                                                              | 0.34 (-0.38 - 1.07)<br>1.42 (0.62 - 2.22)*<br>1.98 (1.11 - 2.85)*                                    |
| <b>RCT, Simulator</b>                            |                                                                     |                                                                                                                                 |                                                                                                                                            |                                                                           |                                                                                                                                                              |                                                                                                                                              |                                                                                                                                                                                                |                                                                                                      |
| Baek and Kim, 2014<br>Korea                      | 55.1±6.1 years (EG)<br><br>56.5±7.5 years (CG)<br><br>Not specified | N=15<br>CNDS + horse riding training<br><br>3 times/week,<br>8 weeks, 30min<br>CNDS therapy +<br>30min horse riding<br>training | N=15<br>CNDS + trunk<br>exercises with<br>Swiss balls<br><br>3 times/week,<br>8 weeks, 30min<br>CNDS therapy +<br>30min trunk<br>exercises | Physical<br><br>Physical<br><br>Other<br>Other<br>Other<br>Other<br>Other | Balance (BioRescue System)<br>Balance (BioRescue System)<br>Muscle Thickness<br>Muscle Thickness<br>Muscle Thickness<br>Muscle Thickness<br>Muscle Thickness | CoP - Path Length [cm]<br><br>CoP - Travel Speed [mm/sec]<br><br>TrA - A<br>TrA - NA<br>IO - A<br>IO - NA<br>EO muscle - A<br>EO muscle - NA | 0.78 (0.04 - 1.53)*<br><br>0.39 (-0.33 - 1.11)*<br><br>0.23 (-0.50 - 0.94)<br>0.17 (-0.56 - 0.87)<br>0.00 (-0.72 - 0.72)<br>0.08 (-0.64 - 0.79)<br>0.33 (-0.39 - 1.05)*<br>0.00 (-0.72 - 0.72) | 0.68 (-0.06 - 1.41)*<br><br>0.39 (-0.33 - 1.11)*<br><br>N/A<br>N/A<br>N/A<br>N/A<br>N/A<br>N/A       |
| Baillet <i>et al.</i> , 2019<br>France           | 51.1±13.0 years (EG)<br><br>39.9±18.6 years (CG)                    | N=10<br>Horse riding therapy<br><br>2 times/week for 12<br>weeks,<br>30min/session                                              | N=8<br>Conventional<br>therapy<br><br>2 times/week for<br>12 weeks,<br>30min/session                                                       | Physical<br>Physical<br>Physical<br>Physical                              | Trunk/horse<br>coordination - 30%<br>Trunk/horse<br>coordination - 40%<br>Trunk/horse<br>coordination - 50%                                                  | Relative Phase<br><br>Relative Phase<br><br>Relative Phase<br><br>Relative Phase                                                             | 3.74 (2.29 - 5.20)*<br><br>1.52 (0.52 - 2.51)*<br><br>1.04 (0.10 - 1.97)<br><br>1.53 (0.53 - 2.52)                                                                                             | 2.31 (1.11 - 3.51)*<br><br>0.80 (-0.16 - 1.77)*<br><br>0.14 (-0.79 - 1.07)<br><br>1.67 (0.59 - 2.75) |

| Study, Location and Study Design   | Patient population                                | Intervention                                                                                               |                                      | Outcome domain       | Assessed Function              | Outcome Measure               | ES (95% CI) - within                       | ES (95% CI) - between                      |
|------------------------------------|---------------------------------------------------|------------------------------------------------------------------------------------------------------------|--------------------------------------|----------------------|--------------------------------|-------------------------------|--------------------------------------------|--------------------------------------------|
|                                    | >1 year post stroke                               |                                                                                                            |                                      |                      | Trunk/horse coordination - 60% |                               |                                            |                                            |
| Cho and Cho, 2015<br>Korea         | 54.20±9.21 (EG) and 54.00±8.79 (CG)               | N=15<br>Therapeutic exercise + horse riding                                                                | N=15<br>Therapeutic exercise         | Physical             | Balance (BioRescue System)     | CoP - EO Moving Distance [cm] | 0.33 (-0.39 - 1.05)                        | 0.01 (-0.71 - 0.73)                        |
|                                    | ≥6 months post stroke                             | 7 times/week, 6 weeks, 30min/session<br>Plus<br>3 times/week, 6 weeks, 20min/session horse-riding training | 7 times/week, 6 weeks, 30min/session | Physical             | Balance (BioRescue System)     | CoP - EC Moving Distance [cm] | 0.63 (-0.10 - 1.37)*                       | 0.31 (-0.41 - 1.03)                        |
| Kim and Lee, 2015<br>Korea         | 71.1±3.0 (EG) and 69.2±3.4 (CG)                   | N=10<br>Horse riding training                                                                              | N=10<br>NDT                          | Physical             | Balance                        | BBS                           | 2.23 (1.32 - 3.14)*                        | 0.81 (-0.10 - 1.72)*                       |
|                                    | ≥6 months post stroke                             | 5 days/week, 6 weeks, 30min/session                                                                        | 5 days/week, 6 weeks, 30min/session  | Physical<br>Physical | Gait<br>ADL                    | 10 mWT<br>MBI                 | 1.55 (0.55 - 2.54)*<br>1.96 (0.89 - 3.03)* | 1.31 (0.35 - 2.28)*<br>1.41 (0.43 - 2.39)* |
| Sung <i>et al.</i> , 2013<br>Korea | 48.2±8.2 (EG) and 54.2±10.4 (CG)                  | N=10<br>Therapeutic exercise + horse-riding                                                                | N=10<br>Therapeutic exercise         | Physical             | Gait (OptoGait System)         | Step length [cm]              | -0.01 (-0.89 - 0.89)                       | 0.11 (-0.77 - 0.98)                        |
|                                    | Not specified, on average 1-1.5 years post stroke | 5 times/week, 4 weeks, 45min/session<br>Plus<br>5 times/week, 4 weeks, 15min/session                       | 5 times/week, 4 weeks, 60min/session | Physical             | Gait (OptoGait System)         | Stance phase [%]              | 0.13 (-0.74 - 1.01)                        | -0.06 (-0.94-0.82)                         |
|                                    |                                                   |                                                                                                            |                                      | Physical             | Gait (OptoGait System)         | Swing phase [%]               | 0.49 (-0.40 - 1.38)                        | 0.57 (-0.32- 1.46)                         |
|                                    |                                                   |                                                                                                            |                                      | Physical             | Gait (OptoGait System)         | Load response [%]             | 1.61 (0.60 - 2.62)*                        | 0.64 (-0.26 - 1.54)*                       |
|                                    |                                                   |                                                                                                            |                                      | Physical             | Gait (OptoGait System)         | Single support [%]            | 2.34 (1.20 - 3.48)*                        | 1.86 (0.81 - 2.91)*                        |
|                                    |                                                   |                                                                                                            |                                      | Physical             | Gait (OptoGait System)         | Total double support [%]      | 1.07 (0.13 - 2.00)*                        | 0.56 (-0.33 - 1.45)                        |
|                                    |                                                   |                                                                                                            |                                      | Physical             | Gait (OptoGait System)         | Pre-swing [%]                 | 1.76 (0.72 - 2.79)*                        | 0.86 (-0.06 - 1.78)*                       |

| Study, Location and Study Design        | Patient population                                                                                     | Intervention                                                                                                      |                                                                                          | Outcome domain                                                 | Assessed Function                                                      | Outcome Measure                                   | ES (95% CI) - within                                                                                                                                             | ES (95% CI) - between                                                                                                 |
|-----------------------------------------|--------------------------------------------------------------------------------------------------------|-------------------------------------------------------------------------------------------------------------------|------------------------------------------------------------------------------------------|----------------------------------------------------------------|------------------------------------------------------------------------|---------------------------------------------------|------------------------------------------------------------------------------------------------------------------------------------------------------------------|-----------------------------------------------------------------------------------------------------------------------|
|                                         |                                                                                                        |                                                                                                                   |                                                                                          | Physical                                                       | Gait (OptoGait System)                                                 | Cadence [step/sec]                                | 0.00 (-0.88 - 0.88)                                                                                                                                              | 0.0 (-0.88 - 0.88)                                                                                                    |
|                                         |                                                                                                        |                                                                                                                   |                                                                                          | Other                                                          | Gait (OptoGait System)                                                 | EMG - Erector Spinae [μV]                         | 0.91 (-0.01 - 1.83)*                                                                                                                                             | 1.20 (0.25 - 2.16)*                                                                                                   |
|                                         |                                                                                                        |                                                                                                                   |                                                                                          | Other                                                          | Trunk Muscle Activity                                                  | EMG - Rectus Abdominis [μV]                       | -0.49 (-1.38 - 0.40)                                                                                                                                             | 0.61 (-0.29 - 1.51)*                                                                                                  |
| <b>NRT, Horse</b>                       |                                                                                                        |                                                                                                                   |                                                                                          |                                                                |                                                                        |                                                   |                                                                                                                                                                  |                                                                                                                       |
| Beinotti <i>et al.</i> , 2010<br>Brazil | 59 years (EG) and 52 years (CG)<br><br>>1 year post stroke                                             | N=10<br>Conventional therapy + EAT<br><br>2 times/week plus 1 time/ week, 16 weeks, session length unknown        | N=10<br>Conventional therapy alone<br><br>3 times/week, 16 weeks, session length unknown | Physical<br>Physical<br>Physical<br>Physical                   | LE Motor<br>Balance<br>Balance<br>Gait<br>Gait                         | FMLE<br><br>BBS<br>FMLE-Balance<br>FAC<br>Cadence | 1.03 (0.09 - 1.96)*<br><br>0.22 (-0.66 - 1.10)*<br>0.14 (-0.74 - 1.01)<br>0.23 (-0.64 - 1.11)<br>-0.16 (-1.03 - 0.72)                                            | 0.66 (-0.24 - 1.56)*<br><br>0.16 (-0.72 - 1.04)<br>0.07 (-0.81 - 0.95)<br>0.00 (-0.88 - 0.88)<br>-0.35 (-1.24 - 0.53) |
| Sunwoo <i>et al.</i> , 2012<br>Korea    | 42.4±16.6 years<br><br>≥6 months post stroke                                                           | N=8<br><br>Horse riding<br><br>2times/week, 8 weeks, 30min/session                                                | No CG                                                                                    | Physical<br>Physical<br>Physical<br>Physical<br>Other<br>Other | Balance<br>Gait<br>Gait<br>Mobility<br>ADL<br>Depression<br>Depression | BBS<br>10 mWT<br>FAC<br>POMA<br>MBI<br>BDI<br>HAM | 0.26 (-0.72 - 1.24)*<br>0.26 (-0.72 - 1.25)*<br>0.00 (-0.98 - 0.98)<br>0.44 (-0.55 - 1.43)*<br>0.12 (-0.86 - 1.10)<br>0.09 (-0.89 - 1.07)<br>0.21 (-0.77 - 1.20) | N/A<br>N/A<br>N/A<br>N/A<br>N/A<br>N/A<br>N/A                                                                         |
| <b>NRT, Simulator</b>                   |                                                                                                        |                                                                                                                   |                                                                                          |                                                                |                                                                        |                                                   |                                                                                                                                                                  |                                                                                                                       |
| Han <i>et al.</i> , 2012<br>Korea       | 61.1±6.3 (EG) and 62.2±6.9 (CG)<br><br>Early chronic stroke patients, on average 12 months post stroke | N=19<br>Conventional physiotherapy (NDT) + horse-riding therapy<br><br>2 times/week, 12 weeks, 30min/session Plus | N=18<br>Conventional physiotherapy (NDT)<br><br>2 times/week, 12 weeks, 30min/session    | Physical<br>Physical<br>Physical<br>Physical                   | Balance<br>Balance<br>Gait<br>Gait                                     | BBS<br>B-POMA<br>FAC<br>G-POMA                    | 1.10 (0.42 - 1.78)*<br>0.93 (0.26 - 1.60)*<br>0.11 (-0.32 - 0.75)<br>0.00 (-0.64 - 0.64)                                                                         | 1.24 (0.54 - 1.94)<br>0.95 (0.27 - 1.63)<br>0.00 (-0.64 - 0.64)<br>-0.13 (-0.78 - 0.51)                               |

| Study, Location and Study Design  | Patient population                            | Intervention                                                                  |                              | Outcome domain | Assessed Function          | Outcome Measure                     | ES (95% CI) - within | ES (95% CI) - between |
|-----------------------------------|-----------------------------------------------|-------------------------------------------------------------------------------|------------------------------|----------------|----------------------------|-------------------------------------|----------------------|-----------------------|
|                                   |                                               | 2 times/week, 12 weeks, 20min/session horse-riding                            |                              |                |                            |                                     |                      |                       |
| Kim <i>et al.</i> , 2014<br>Korea | 63.9 ± 8.7 years<br><br>≥6 months post stroke | N=20<br><br>Horse riding training<br><br>5 times/week, 6 weeks, 30min/session | No CG                        | Physical       | Trunk Impairment           | TIS                                 | 1.43 (0.73 - 2.12)*  | N/A                   |
|                                   |                                               |                                                                               |                              | Physical       | Balance (BioRescue System) | EO - Sway area [cm]                 | 0.35 (-0.27 - 0.98)* | N/A                   |
|                                   |                                               |                                                                               |                              | Physical       | Balance (BioRescue System) | EO - Sway length [mm <sup>2</sup> ] | 0.67 (0.04 - 1.31)*  | N/A                   |
|                                   |                                               |                                                                               |                              | Physical       | Balance (BioRescue System) | EO - Sway speed [cm/s]              | 0.46 (-0.16 - 1.09)* | N/A                   |
|                                   |                                               |                                                                               |                              | Physical       | Balance (BioRescue System) | EC - Sway area [cm]                 | 0.50 (-0.13 - 1.12)* | N/A                   |
|                                   |                                               |                                                                               |                              | Physical       | Balance (BioRescue System) | EC - Sway length [mm <sup>2</sup> ] | 1.13 (0.46 - 1.79)*  | N/A                   |
|                                   |                                               |                                                                               |                              | Physical       | Gait                       | EC - Sway speed [cm/s]              | 1.13 (0.46 - 1.79)*  | N/A                   |
|                                   |                                               |                                                                               |                              | Physical       | Gait (Gaitrite)            | FGA                                 |                      |                       |
|                                   |                                               |                                                                               |                              | Physical       | Gait (Gaitrite)            | Velocity [cm/s]                     |                      |                       |
|                                   |                                               |                                                                               |                              | Physical       | Gait (Gaitrite)            | Cadence [steps/min]                 | 1.13 (0.46 - 1.79)*  | N/A                   |
|                                   |                                               |                                                                               |                              | Physical       | Gait (Gaitrite)            | Stride – A [cm]                     |                      |                       |
|                                   |                                               |                                                                               |                              | Physical       | Gait (Gaitrite)            | Stride – NA [cm]                    | 1.62 (0.90 – 2.33)*  | N/A                   |
|                                   |                                               |                                                                               |                              | Physical       | Gait (Gaitrite)            | Double Support – A [%]              | 0.59 (-0.04 – 1.22)* | N/A                   |
|                                   |                                               |                                                                               |                              | Physical       | Gait (Gaitrite)            | Double Support – NA [%]             | 0.33 (-0.30 – 0.95)* | N/A                   |
| Physical                          | Gait (Gaitrite)                               |                                                                               | 0.35 (-0.28 – 0.97)*         | N/A            |                            |                                     |                      |                       |
| Physical                          | Gait (Gaitrite)                               |                                                                               | 0.29 (-0.34 – 0.91)*         | N/A            |                            |                                     |                      |                       |
| Physical                          | Gait (Gaitrite)                               |                                                                               | 0.59 (-0.05 – 1.22)*         | N/A            |                            |                                     |                      |                       |
| Physical                          | Gait (Gaitrite)                               |                                                                               | 0.31 (-0.32 – 0.93)*         | N/A            |                            |                                     |                      |                       |
| Lee and Kim, 2015<br>Korea        | 68.4±2.1 (EG) and 67.0±3.2 (CG)               | N=15<br>Conventional therapy + horse-riding                                   | N=15<br>Conventional therapy | Physical       | Balance                    | BBS                                 | 2.23 (1.32 - 3.14)*  | 1.66 (0.83 - 2.49)*   |
|                                   |                                               |                                                                               |                              | Physical       | Gait                       | TUGT                                | 1.84 (0.98 - 2.69)*  | 1.85 (1.00 - 2.71)*   |
|                                   |                                               |                                                                               |                              | Other          | Depression                 | BDI                                 | 1.58 (0.76 - 2.40)*  | 1.25 (0.47 - 2.04)*   |



| Study, Location and Study Design    | Patient population                                                                                                  | Intervention                                                                                                                                                    |                                                                                                                                                                 | Outcome domain                       | Assessed Function                                                       | Outcome Measure                 | ES (95% CI) - within                                                                                                                             | ES (95% CI) - between                                                   |
|-------------------------------------|---------------------------------------------------------------------------------------------------------------------|-----------------------------------------------------------------------------------------------------------------------------------------------------------------|-----------------------------------------------------------------------------------------------------------------------------------------------------------------|--------------------------------------|-------------------------------------------------------------------------|---------------------------------|--------------------------------------------------------------------------------------------------------------------------------------------------|-------------------------------------------------------------------------|
|                                     | Early chronic stage, on average 12 months post stroke                                                               | 5 days/week, 6 weeks, 30min/session<br>Plus<br>5 times/ week, 6 weeks, 30min/session<br>horse-riding                                                            | 5 days/week, 6 weeks, 30min/session                                                                                                                             |                                      |                                                                         |                                 |                                                                                                                                                  |                                                                         |
| Park <i>et al.</i> , 2013<br>Korea  | 56.09±7.22 years (EG) and 51.55±8.27 years (CG)<br><br>≥7 months post stroke                                        | N=34<br>Physical therapy + horse riding<br><br>6 times/ week, 8 weeks, session duration unknown<br>Plus<br>3 times/week, 8 weeks, 35min/session<br>horse riding | N=33<br>Physical therapy + mat exercise<br><br>6 times/ week, 8 weeks, session duration unknown<br>Plus<br>3 times/week, 8 weeks, 35min/session<br>mat exercise | Physical<br>Physical<br><br>Physical | Balance<br>Balance (KAT balance system)<br>Balance (KAT balance system) | BBS<br>EOB (BI)<br><br>ECB (BI) | 1.26 (0.74 - 1.78)*<br>0.08 (-0.40 - 0.56)*<br><br>0.71 (0.22 - 1.20)*                                                                           | 0.57 (0.09 - 1.06)*<br>-0.04 (-0.52 - 0.44)<br><br>0.31 (-0.17 - 0.80)* |
| <b>Qualitative Study, Horse</b>     |                                                                                                                     |                                                                                                                                                                 |                                                                                                                                                                 |                                      |                                                                         |                                 |                                                                                                                                                  |                                                                         |
| Pohl <i>et al.</i> , 2018<br>Sweden | N=18 (selected from larger sample in <sup>5</sup><br><br>Mean age: 62 years<br>≥10 months and ≤5 years after stroke | See Bunketorp-Käll <i>et al.</i> , 2017                                                                                                                         | See Bunketorp-Käll <i>et al.</i> , 2017                                                                                                                         | Other                                | Perception of Intervention                                              | Semi-structured interview       | Identification of four broad themes: transformative experience; human–horse interaction; togetherness and belonging; and the all-in-one solution | N/A                                                                     |

174 ***Subject characteristics***

175 In total, data from 437 patients (mean age range: 40 – 70 years) were included in this  
176 systematic review. Sample sizes ranged from 8 to 123 patients. With the exception of  
177 two studies (Baek and Kim, 2014, Lee *et al.*, 2014a), the stroke stage was specified.  
178 In one study, the minimum time since stroke was not reported, but the patients had  
179 suffered a stroke on average about one year earlier. (Sung *et al.*, 2013) All other  
180 studies included patients at the chronic stage of stroke (i.e., > 6 months post stroke).  
181 In two studies (Sunwoo *et al.*, 2012; Baillet *et al.*, 2019), the majority of patients were  
182 stroke patients, although, a small number of traumatic brain injury and cerebral palsy  
183 patients were also included. All other studies involved stroke patients only.

184 ***Study characteristics and methodological quality***

185 The included studies were conducted in Brazil (Beinotti *et al.*, 2010, 2013), France  
186 (Baillet *et al.*, 2019), Korea (Han *et al.*, 2012; Sunwoo *et al.*, 2012; Park *et al.*, 2013;  
187 Sung *et al.*, 2013, Kim *et al.*, 2014a, Lee *et al.*, 2014a; Cho and Cho, 2015; Kim and  
188 Lee, 2015; Lee and Kim, 2015), and Sweden (Bunketorp-Käll *et al.*, 2017b; Pohl *et al.*,  
189 2018; Bunketorp-Käll *et al.*, 2019, 2020).

190 Study design and methodological quality, assessed by MMAT, are displayed in  
191 Supplemental Material (Tab. 2). Data from eight Randomized Controlled Trial (RCT),  
192 six Non-Randomized Trial (NRT). Moreover, one report referring to data of one RCT  
193 reported qualitative outcome and was therefore assessed separately. The overall study  
194 quality varied between the studies. Specifically, seven reported studies (Sunwoo *et al.*,  
195 2012; Beinotti *et al.*, 2013, Kim *et al.*, 2014a, Bunketorp-Käll *et al.*, 2017b; Pohl *et al.*,  
196 2018; Bunketorp-Käll *et al.*, 2019, 2020) fulfilled at least four out of the five quality  
197 criteria. However, other studies were lacking in major methodological details,  
198 suggesting that they had not been met. Major risks of bias include inappropriate

199 randomization or insufficient information regarding randomization in five out of eight  
200 RCT. Other concerns include missing data, blinding and incomplete information about  
201 adherence to assigned intervention.

**Tab. 2. Overview of study quality.** Study quality was assessed by MMAT. Depending on the method of the study, quality was assessed using different questions.

Questions: S1: Are there clear research questions?, S2: Do the collected data allow to address the research questions?, 1.1: Is the qualitative approach appropriate to answer the research question?, 1.2: Are the qualitative data collection methods adequate to address the research question?, 1.3: Are the findings adequately derived from the data?, 1.4: Is the interpretation of results sufficiently substantiated by data?, 1.5: Is there coherence between qualitative data sources, collection, analysis and interpretation?, 2.1: Is randomization appropriately performed?, 2.2: Are the groups comparable at baseline?, 2.3: Are there complete outcome data? [at least 80% of data], 2.4: Are outcome assessors blinded to the intervention provided?, 2.5: Did the participants adhere to the assigned intervention?, 3.1: Are the participants representative of the target population?, 3.2: Are measurements appropriate regarding both the outcome and intervention (or exposure)?, 3.3: Are there complete outcome data?, 3.4: Are the confounders accounted for in the design and analysis?, 3.5: During the study period, is the intervention administered (or exposure occurred) as intended? (Hong et al., 2018)

Abbreviations: MMAT = Mixed Methods Appraisal Tool, N = criterion not met, NRT = Non-randomized Trial, RCT = Randomized Controlled Trial, U = unclear if criterion was met, Y = criterion met

\*Findings from data of same study.

| Study                   | MMAT assessment |    |             |     |     |     |     |                  |     |     |     |     |                  |     |     |     |     |
|-------------------------|-----------------|----|-------------|-----|-----|-----|-----|------------------|-----|-----|-----|-----|------------------|-----|-----|-----|-----|
|                         | Screening       |    | Qualitative |     |     |     |     | Quantitative RCT |     |     |     |     | Quantitative NRT |     |     |     |     |
|                         | S1              | S2 | 1.1         | 1.2 | 1.3 | 1.4 | 1.5 | 2.1              | 2.2 | 2.3 | 2.4 | 2.5 | 3.1              | 3.2 | 3.3 | 3.4 | 3.5 |
| (Baek and Kim, 2014)    | Y               | Y  |             |     |     |     |     | U                | Y   | Y   | N   | U   |                  |     |     |     |     |
| (Baillet et al., 2019)  | Y               | Y  |             |     |     |     |     | Y                | Y   | Y   | N   | U   |                  |     |     |     |     |
| (Beinotti et al., 2010) | Y               | Y  |             |     |     |     |     |                  |     |     |     |     | Y                | Y   | U   | Y   | U   |
| (Beinotti et al., 2013) | Y               | Y  |             |     |     |     |     | Y                | Y   | Y   | Y   | Y   |                  |     |     |     |     |

| Study                                   | MMAT assessment |    |             |     |     |     |     |                  |     |     |     |     |                  |     |     |     |     |
|-----------------------------------------|-----------------|----|-------------|-----|-----|-----|-----|------------------|-----|-----|-----|-----|------------------|-----|-----|-----|-----|
|                                         | Screening       |    | Qualitative |     |     |     |     | Quantitative RCT |     |     |     |     | Quantitative NRT |     |     |     |     |
|                                         | S1              | S2 | 1.1         | 1.2 | 1.3 | 1.4 | 1.5 | 2.1              | 2.2 | 2.3 | 2.4 | 2.5 | 3.1              | 3.2 | 3.3 | 3.4 | 3.5 |
| (Bunketorp-Käll <i>et al.</i> , 2017b)* | Y               | Y  |             |     |     |     |     |                  |     |     |     |     |                  |     |     |     |     |
| (Bunketorp-Käll <i>et al.</i> , 2019)*  | Y               | Y  |             |     |     |     |     | Y                | Y   | Y   | Y   | U   |                  |     |     |     |     |
| (Bunketorp-Käll <i>et al.</i> , 2020)*  | Y               | Y  |             |     |     |     |     |                  |     |     |     |     |                  |     |     |     |     |
| (Cho and Cho, 2015)                     | Y               | Y  |             |     |     |     |     | U                | Y   | Y   | U   | U   |                  |     |     |     |     |
| (Han <i>et al.</i> , 2012)              | Y               | Y  |             |     |     |     |     |                  |     |     |     |     | Y                | Y   | U   | N   | U   |
| (Kim <i>et al.</i> , 2014b)             | Y               | Y  |             |     |     |     |     |                  |     |     |     |     | Y                | Y   | Y   | Y   | U   |
| (Kim and Lee, 2015)                     | Y               | Y  |             |     |     |     |     | U                | Y   | U   | U   | U   |                  |     |     |     |     |
| (Lee <i>et al.</i> , 2014a)             | Y               | Y  |             |     |     |     |     | U                | Y   | U   | U   | U   |                  |     |     |     |     |
| (Lee and Kim, 2015)                     | Y               | Y  |             |     |     |     |     |                  |     |     |     |     | Y                | N   | U   | N   | U   |
| (Park <i>et al.</i> , 2013)             | Y               | Y  |             |     |     |     |     |                  |     |     |     |     | Y                | Y   | U   | Y   | U   |
| (Pohl <i>et al.</i> , 2018)             | Y               | Y  | Y           | Y   | Y   | Y   | Y   |                  |     |     |     |     |                  |     |     |     |     |
| (Sung <i>et al.</i> , 2013)             | Y               | Y  |             |     |     |     |     | U                | Y   | U   | U   | U   |                  |     |     |     |     |
| (Sunwoo <i>et al.</i> , 2012)           | Y               | Y  |             |     |     |     |     |                  |     |     |     |     | Y                | Y   | Y   | Y   | Y   |

## 202 **Intervention**

203 Different forms of intervention and terminology were used. Four studies referred to their  
204 intervention as *hippotherapy* (Beinotti *et al.*, 2010; Sunwoo *et al.*, 2012, Lee *et al.*,  
205 2014b) or *hippotherapy simulator* (Sung *et al.*, 2013); four studies used *horse-riding*  
206 *therapy* (Bunketorp-Käll *et al.*, 2017b, 2019, 2020) or *horse-riding exercise* (Kim and  
207 Lee, 2015); two studies used *horseback riding* (Pohl *et al.*, 2018) or *horseback riding*  
208 *therapy* (Beinotti *et al.*, 2013); two studies used *horse riding simulation training* (Baek  
209 and Kim, 2014, Kim *et al.*, 2014a); one study used *horseback riding simulator exercise*  
210 (Park *et al.*, 2013), a further study used *mechanical horse practice* (Baillet *et al.*, 2019);  
211 and three studies referred to their intervention as *mechanical horseback riding* (Han *et*  
212 *al.*, 2012; Cho and Cho, 2015; Lee and Kim, 2015). The exact protocol was not, or only  
213 briefly described in most studies. In general, some studies included exercises during  
214 riding while other studies did not.

215 A short summary of the parameters of EG and CG applied in each study can be found  
216 in Tab. 1. While eight studies applied EAT in addition to conventional therapy (Beinotti  
217 *et al.*, 2010; Han *et al.*, 2012; Beinotti *et al.*, 2013; Park *et al.*, 2013; Sung *et al.*, 2013;  
218 Baek and Kim, 2014; Cho and Cho, 2015; Lee and Kim, 2015), the others applied EAT  
219 only. (Sunwoo *et al.*, 2012, Kim *et al.*, 2014a, Lee *et al.*, 2014a; Kim and Lee, 2015,  
220 Bunketorp-Käll *et al.*, 2017b; Pohl *et al.*, 2018; Baillet *et al.*, 2019; Bunketorp-Käll *et*  
221 *al.*, 2019, 2020) Total time of EAT varied between 300 and 5760min ( $1043 \pm 1377$ min,  
222 Mean  $\pm$  SD). EAT was applied within four to 16 weeks, in 16 to 30 total sessions.

223 With the exception of two studies (Sunwoo *et al.*, 2012, Kim *et al.*, 2014a), all included  
224 a CG which consisted of treadmill training (Lee *et al.*, 2014a) or another form of  
225 conventional therapy in the other studies. While most of the studies had comparable  
226 doses for the EG and CG, in four studies, both groups performed the same training

227 and the EG did EAT in addition; thus resulting in different training doses. (Han *et al.*,  
228 2012; Beinotti *et al.*, 2013; Cho and Cho, 2015; Lee and Kim, 2015)

229 In five studies, the intervention was applied with horses (Beinotti *et al.*, 2010; Sunwoo  
230 *et al.*, 2012; Beinotti *et al.*, 2013, Lee *et al.*, 2014a, Bunketorp-Käll *et al.*, 2017b; Pohl  
231 *et al.*, 2018; Bunketorp-Käll *et al.*, 2019, 2020), whereas the other studies used riding  
232 simulators.

### 233 **Outcome measures**

#### 234 *Physical measures*

235 Thirteen studies evaluated the effects of EAT on physical outcome measures.<sup>14,40,42–</sup>  
236 <sup>52,55</sup> The domains evaluated included balance, gait, postural coordination, activities of  
237 daily living (ADL), lower extremity motor impairment, motor function and hand strength.

238 Balance was measured in eleven studies.<sup>8,14,42,45–52</sup> It was assessed by the Berg  
239 Balance Scale (BBS), Balance Part of the Performance Oriented Mobility Assessment  
240 (B-POMA, POMA), Balance systems, Balance Items of the Fugl-Meyer Lower  
241 Extremity Scale (FMLE), and Bäckstrand, Dahlberg and Liljenäs Balance Scale (BDL-  
242 BS) and the Trunk Impairment Scale (TIS).

243 Gait was assessed in nine studies.<sup>8,40,42,43,45–47,49–51</sup> It was investigated by the  
244 Functional Ambulation Category Scale (FAC), Functional Gait Assessments (FGA; part  
245 cadence), Timed Up and Go Test (TUGT), Timed 10-meter walk test (10 mWT), the  
246 six-minute walk test (6 MWT), Gait part of Performance Oriented Mobility Assessment  
247 (G-POMA), and Gait analyzer (measures: Cadence, Double Support, Load Response,  
248 Pre-Swing, Single Support, Stance Phase, Step Length Asymmetry, Step Length,  
249 Stride, Swing Phase, Velocity).

250 In one study, an optical tracking system was used to assess postural coordination.<sup>44</sup>

251 ADL were investigated in two studies using the Modified Barthel Index (MBI).<sup>45,50</sup>

252 In one study, general motor function was investigated using the Modified Motor  
253 Assessment Scale according to Uppsala University Hospital (M-MAS UAS) and hand  
254 strength was assessed using a dynamometer (Gripit)<sup>8,40</sup> In another study, lower  
255 extremity motor impairment was investigated by the FMLE.<sup>46</sup>

#### 256 *Further health-related measures*

257 The effects on further health-related outcome measures were investigated in seven  
258 studies.<sup>8,14,18,41,43,45,51,53</sup> The measures included depression, perception of the  
259 intervention and of recovery from stroke, cognition, quality of life (QoL), muscle  
260 thickness, as well as trunk muscle activity.

261 Depression was assessed in two studies by Becks Depression Inventory (BDI) and/or  
262 Hamilton Depression Rating Scale (HAM).<sup>45,51</sup> Another study assessed different  
263 domains of the patients' perception of EAT. Specifically, a qualitative assessment  
264 using semi-structured interviews was performed in one report<sup>53</sup>, and the correlation  
265 between changes in different outcomes and the change in perceived recovery from  
266 stroke was estimated in another report.<sup>41,53</sup> Furthermore, the change in perceived  
267 recovery from stroke (Stroke Impact Scale, Item 9; SIS-9) after EAT was also assessed  
268 in this study. Moreover, both the general cognitive level and the working memory were  
269 examined using the Barrow Neurological Institute screen for higher cerebral functions  
270 and the Letter-number sequencing test, respectively.<sup>8</sup> QoL was investigated in one  
271 study by the Medical Outcomes Study 36-item Short-Form health survey (SF-16).<sup>18</sup>

272 One study examined muscle thickness using ultrasonic imaging.<sup>14</sup> The other study  
273 investigated trunk muscle activity by electromyography (EMG).<sup>43</sup>

274



275 ***Effects of intervention on outcome measures***

276 *Effects of EAT on physical outcome*

277 Our search revealed studies identifying effects of EAT on balance and gait. Therefore,  
278 an overview of within- and between-effects of EAT on both balance and gait is shown  
279 in Fig. 2 and Fig. 3, respectively. While different study designs (RCT and NRT) are  
280 indicated in these plots, results appeared to be independent of the study design.  
281 Therefore, in the following, findings are described for all included studies together.

**A**  
Balance within

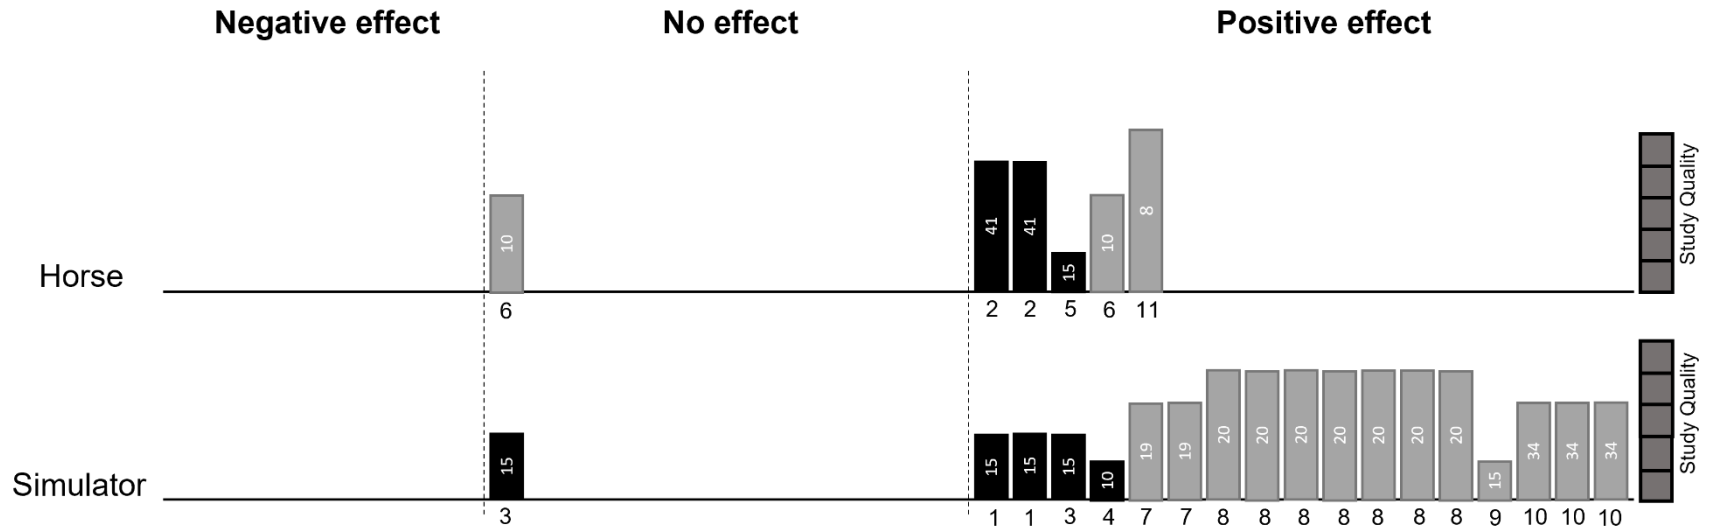

**B**  
Balance between

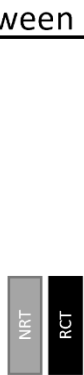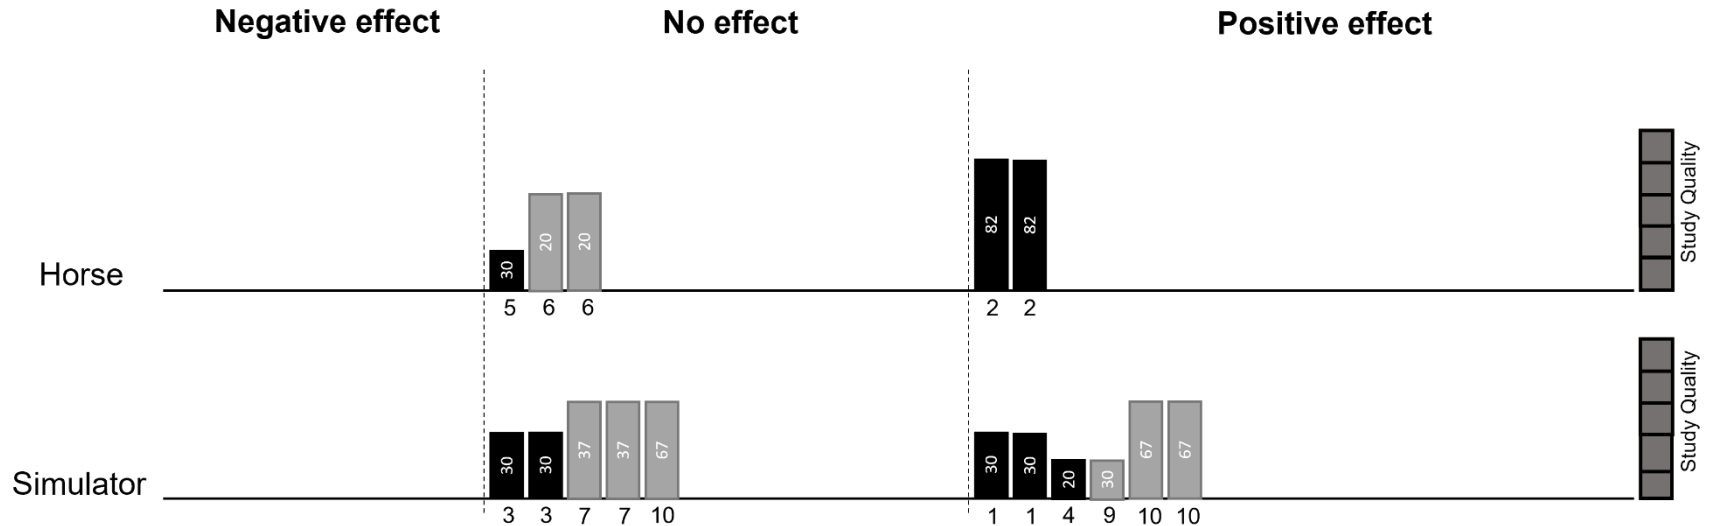

**Fig. 2. Harvest Plot: Effects of EAT on balance.** A) shows within-effects of EAT on balance, and B) shows between-effects. Both in A) and B) each bar represents one outcome related to balance of one study (in case one study assessed balance using multiple outcome measures, each is represented in a separate bar; the study identification is indicated by a number below the bar). In the upper row, studies applying EAT with horses are shown, and in the lower row, studies applying EAT with simulators are shown. The colour of the bars indicates the study design (RCT: black, NRT: grey). The height of the bar represents the study quality, assessed by the Mixed Methods Appraisal Tool. The number in the box represents the sample size.

Studies are grouped according to a negative (left), no (middle), or a positive effect (right), based on the reported statistical test results in the respective papers.

Studies: 1: Baek and Kim 2014, 2: Bunketorp-Käll et al. 2017, 3: Cho and Cho 2015, 4: Kim and Lee 2015, 5: Lee et al. 2014, 6: Beinotti et al. 2010, 7: Han et al. 2012, 8: Kim et al. 2014, 9: Lee and Kim 2015, 10: Park et al. 2013, 11: Sunwoo et al. 2012

**A**  
Gait within

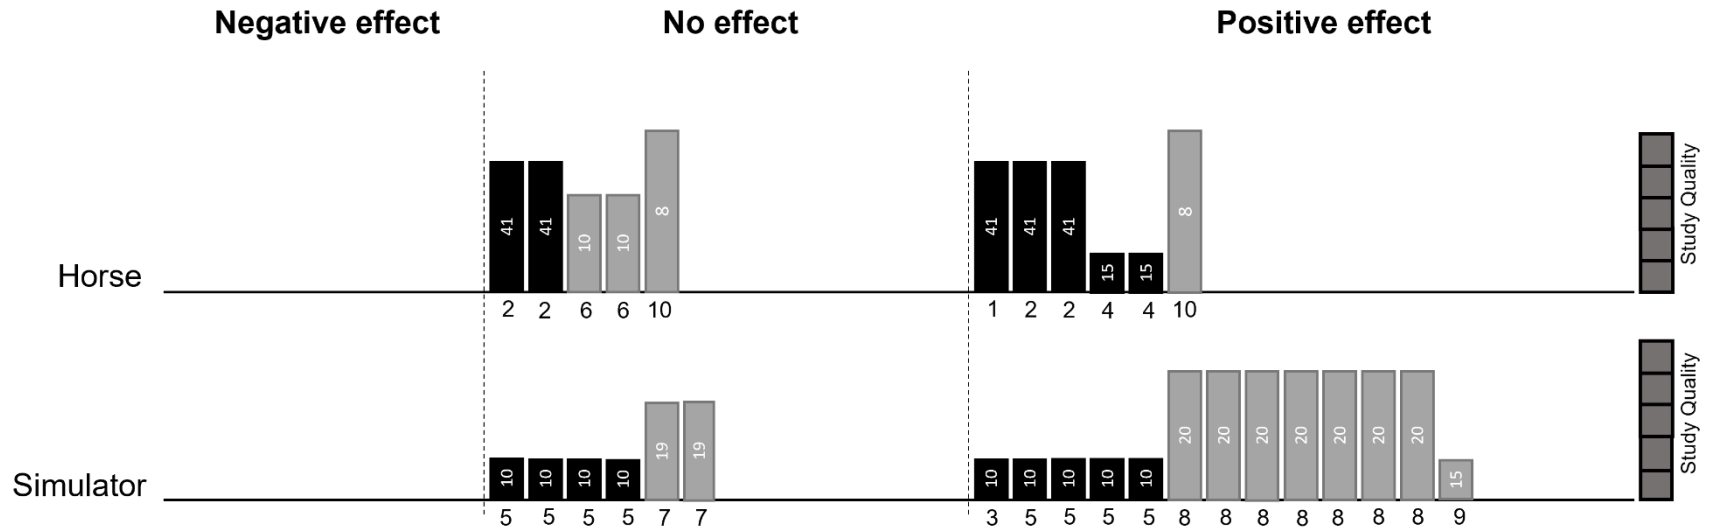

**B**  
Gait between

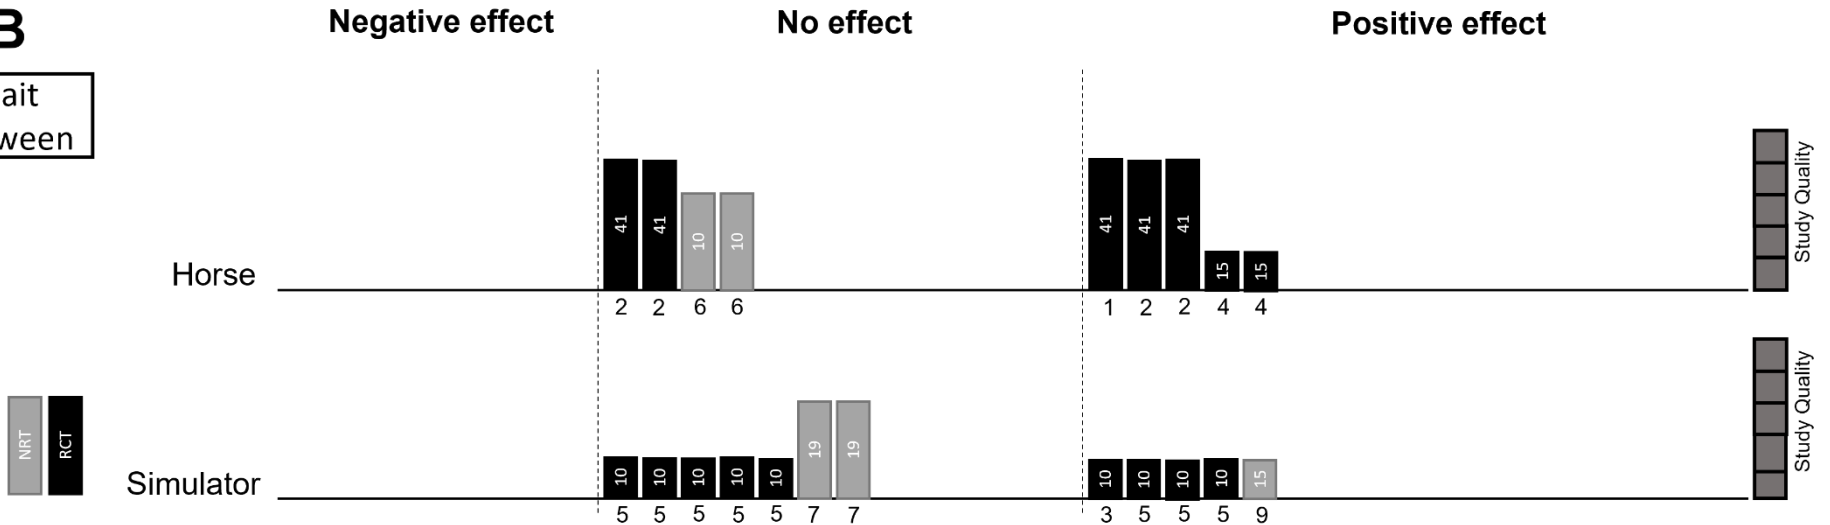

**Fig. 3. Harvest Plot: Effects of EAT on gait.** A) shows within-effects of EAT on gait, and B) shows between-effects. Both in A) and B) each bar represents one outcome related to gait of one study (in case one study assessed gait using multiple outcome measures, each is represented in a separate bar; the study identification is indicated by a number below the bar). In the upper row, studies applying EAT with horses are shown, and in the lower row, studies applying EAT with simulator are shown. The colour of the bars indicates the study design (RCT: black, NRT: grey). The height of the bar represents the study quality, assessed by the Mixed Methods Appraisal Tool. The number in the box represents the sample size.

Studies are grouped according to showing a negative (left), no (middle), or a positive effect (right), based on the reported statistical test results in the respective papers.

Studies: 1: Bunketorp-Käll et al. 2017, 2: Bunketorp-Käll et al. 2019, 3: Kim and Lee 2015, 4: Lee et al. 2014, 5: Sung et al. 2013, 6: Beinotti et al. 2010, 7: Han et al. 2012, 8: Kim et al. 2014, 9: Lee and Kim 2015, 10: Sunwoo et al. 2012

282 Balance was usually assessed by BBS, i.e., in eight out of eleven studies. All of these  
283 reported significant within-effects (Cohen's  $d = 0.22$  to  $2.23$ ) (Beinotti *et al.*, 2010; Han  
284 *et al.*, 2012; Sunwoo *et al.*, 2012; Park *et al.*, 2013, Lee *et al.*, 2014a; Kim and Lee,  
285 2015; Lee and Kim, 2015, Bunketorp-Käll *et al.*, 2017b). Moreover, significant within-  
286 effects in POMA (Sunwoo *et al.*, 2012) (Cohen's  $d = 0.44$ ), B-POMA (Han *et al.*, 2012)  
287 (Cohen's  $d = 0.93$ ), BDL-BS (Cohen's  $d = 0.89$ ) (Bunketorp-Käll *et al.*, 2017b) and TIS  
288 (Kim *et al.*, 2014a) (Cohen's  $d = 1.43$ ) were observed after EAT. With balance systems,  
289 significant effects on balance could be identified, specifically on Center of Pressure  
290 (COP) path length (Cohen's  $d = 0.78$ ) and COP travel speed (Cohen's  $d = 0.39$ ) (Baek  
291 and Kim, 2014), EC moving distance of COP (Cohen's  $d = 0.63$ ) (Cho and Cho, 2015),  
292 EO and EC sway length (Cohen's  $d = 0.67$  and  $1.13$ , respectively), EO and EC sway  
293 speed (Cohen's  $d = 0.46$  and  $1.13$ , respectively) (Kim *et al.*, 2014a), and EO and EC  
294 sway area (Cohen's  $d = 0.35$  and  $0.50$ , respectively) (Kim *et al.*, 2014a); EO balance  
295 (Cohen's  $d = 0.08$ ) and EC balance (Cohen's  $d = 0.71$ ) (Park *et al.*, 2013). However,  
296 no significant effect was found for EO moving distance of COP (Cohen's  $d = 0.33$ ) (Cho  
297 and Cho, 2015) or for the balance part of FMLE (Cohen's  $d = 0.14$ ) (Beinotti *et al.*,  
298 2010).

299 Moreover, nine studies assessed between-effects of EAT on balance. Improvements  
300 in BBS were found to be significantly higher in EG than CG in four out of seven studies  
301 (Cohen's  $d$  between  $0.57$  and  $1.66$ ) investigating between-effects on BBS. (Park *et al.*,  
302 2013; Kim and Lee, 2015; Lee and Kim, 2015, Bunketorp-Käll *et al.*, 2017b) In addition,  
303 significant between-effects on balance were found for COP Path Length and Travel  
304 Speed (Cohen's  $d = 0.68$  and  $0.39$ , respectively) (Baek and Kim, 2014), the BDL-BS  
305 (Cohen's  $d = 0.11$ ) (Bunketorp-Käll *et al.*, 2017b), EC balance (Cohen's  $d = 0.31$ ) (Park  
306 *et al.*, 2013). However, no significant between-effects were found for FMLE-balance

307 (Cohen's  $d = 0.07$ ) (Beinotti *et al.*, 2010), EO and EC COP Moving Distance (Cohen's  
308  $d = 0.01$  and  $0.31$ , respectively) (Cho and Cho, 2015), B-POMA (0.95) (Han *et al.*,  
309 2012), or EO balance (Cohen's  $d = -0.04$ ) (Park *et al.*, 2013).

310 For gait, positive within-effects of EAT were noted in the TUGT (Cohen's  $d$  between  
311  $0.48$  and  $1.84$ ) (Lee and Kim, 2015, Bunketorp-Käll *et al.*, 2017b) and the 10 mWT  
312 (Cohen's  $d$  between  $0.26$  and  $1.55$ ) (Sunwoo *et al.*, 2012; Kim and Lee, 2015;  
313 Bunketorp-Käll *et al.*, 2019). Moreover, with gait analyzer, positive effects were found  
314 on velocity (Cohen's  $d = 0.59 - 2.06$ ) (Kim *et al.*, 2014a, Lee *et al.*, 2014a), stride of  
315 the affected and unaffected sides (Cohen's  $d = 0.35$  and  $0.29$ , respectively), Double  
316 Support of the affected and unaffected sides (Cohen's  $d = 0.59$  and  $0.31$ , respectively)  
317 (Kim *et al.*, 2014a), Step Length Asymmetry (Cohen's  $d = 2.60$ ) (Lee *et al.*, 2014a),  
318 single support (Cohen's  $d = 2.34$ ), load response (Cohen's  $d = 1.61$ ), total double  
319 support (Cohen's  $d = 1.07$ ), and pre-swing (Cohen's  $d = 1.76$ ) (Sung *et al.*, 2013).  
320 However, no effects of EAT on gait were detected in the 6 MWT (Cohen's  $d = 0.68$ )  
321 (Bunketorp-Käll *et al.*, 2019), the FAC (Cohen's  $d$  between  $0.00$  and  $0.23$ ) (Beinotti *et*  
322 *al.*, 2010; Han *et al.*, 2012; Sunwoo *et al.*, 2012), or on the G-POMA (Cohen's  $d = 0.00$ )  
323 (Han *et al.*, 2012). In addition, with gait analyzer, no effects of EAT were found on step  
324 length (Cohen's  $d = -0.01$ ), stance phase (Cohen's  $d = 0.13$ ), or swing phase (Cohen's  
325  $d = 0.49$ ) (Sung *et al.*, 2013). For cadence, one study found a positive effect (Kim *et*  
326 *al.*, 2014a) (Cohen's  $d = 0.33$ ; assessed by gait analyzer), while others reported a  
327 negative effect (Beinotti *et al.*, 2010; Sung *et al.*, 2013) (Cohen's  $d = -0.16$ , assessed  
328 by FGA; and Cohen's  $d = 0.00$ , gait analyzer).

329 Moreover, between-effects of EAT on gait were investigated for the following gait  
330 parameters: FAC, Cadence, TUGT, 10 mWT, 6 MWT, G-POMA as well as on gait  
331 velocity, step length asymmetry, step length, stance phase, swing phase, load

332 response, single support, total double support, pre-swing and cadence using Gait  
333 Analyzer. Significant between-effects were found for the 10 mWT (Cohen's  $d = 0.08 -$   
334  $1.31$ ) (Kim and Lee, 2015; Bunketorp-Käll *et al.*, 2019), TUGT (Cohen's  $d = 1.85$ ) (Lee  
335 and Kim, 2015), Gait velocity (Cohen's  $d = 1.42$ ), Step Length Asymmetry (Cohen's  $d$   
336  $= 1.96$ ) (Lee *et al.*, 2014a), Load Response (Cohen's  $d = 0.64$ ), Single Support  
337 (Cohen's  $d = 1.86$ ), and Pre-Swing (Cohen's  $d = 0.86$ ) (Sung *et al.*, 2013).

338 In addition, benefits of EAT on posture were found within a pilot study (Cohen's  $d$   $1.04$   
339  $- 3.74$ ). (Baillet *et al.*, 2019)

340 Of the two studies investigating changes in ADL after EAT, one study detected a  
341 significant improvement in ADL (Cohen's  $d = 1.96$ ) (Kim and Lee, 2015), while the  
342 other study did not find an effect on ADL (Cohen's  $d = 0.12$ ) (Sunwoo *et al.*, 2012).

343 In one study, lower extremity motor impairment improved significantly in the EG  
344 (Cohen's  $d = 1.03$ ), and these improvements were also significantly larger than for CG  
345 (Cohen's  $d = 0.66$ ). (Beinotti *et al.*, 2010)

346 Moreover, there was a significant improvement in overall motor function after EAT in  
347 one study, when comparing EG and CG (Cohen's  $d = 0.23$ ). (Bunketorp-Käll *et al.*,  
348 2019)

349 However, there was no significant effect of EAT on hand strength. (Bunketorp-Käll *et*  
350 *al.*, 2017b)

### 351 *Effects of EAT on further health-related outcome*

352 Findings for depression varied between studies. One study reported significant  
353 improvements in the BDI after EAT<sup>51</sup>, for the comparisons pre to post EAT, and EG to  
354 CG (Cohen's  $d = 1.58$  and  $1.25$ , respectively), while the other did not show any  
355 significant changes for the BDI or the HAM.<sup>45</sup>



356 Two studies investigated the perception of the intervention itself, which was reported  
357 to have positive effects on different domains.<sup>53</sup> To summarize, stroke patients  
358 perceived the intervention as a rich and pleasurable experience that had a positive  
359 impact on their emotional and physical domains.<sup>53</sup> Furthermore, changes in perceived  
360 recovery were associated with improved aspects of gait.<sup>41</sup>

361 Perceived recovery from stroke increased significantly after EAT and persisted for  
362 three- and six-months post intervention (Cohen's  $d = 0.78$ , 3-months post intervention).

363 This increase was furthermore significantly higher than for the CG (Cohen's  $d = 0.95$ ).<sup>8</sup>

364 Although there were slight increases in general cognition and the Letter Number  
365 Sequencing test in one study, no significant effect was observed for these parameters  
366 after EAT (Cohen's  $d = 0.30$  and  $0.17$ , respectively).<sup>8</sup>

367 There was a positive effect on QoL after EAT, in particular for the domains of functional  
368 capacity, physical aspects and mental health.<sup>18</sup>

369 Prior to EAT, the external oblique muscle on the affected side was significantly less  
370 thick than on the non-affected side, as measured by ultrasonic imaging. Following EAT,  
371 the thickness increased significantly (Cohen's  $d = 0.33$ ), and was therefore more  
372 similar to the non-affected side. By contrast, muscle thickness of the internal oblique  
373 and transversus abdominis was comparable between affected and non-affected side  
374 and did not change after the intervention.<sup>14</sup>

375 In addition, by using EMG recordings, the trunk muscle activity during sit-to-stand was  
376 measured after EAT. Paretic erector spinae activation was significantly higher for the  
377 EG after the intervention (Cohen's  $d = 0.91$ ) which, moreover, differed significantly from  
378 the CG (Cohen's  $d = 1.20$ ). By contrast, the rectus abdominis remained unchanged.<sup>43</sup>

379

380 *Difference in physical outcome when applying EAT with horses or riding simulators*

381 In general, we could only identify five studies applying EAT after stroke with horses. It  
382 was only possible to compare the differences for balance and gait.

383 For within-effects on balance, four studies applied EAT with horses and seven studies  
384 in simulators (see Fig. 2). Positive within-effects were found for most studies/  
385 outcomes, independent of EAT with horses or simulators, study quality or design.

386 Three vs. six studies investigated between-effects on balance with horses and  
387 simulators, respectively. Significant between-effects on balance were found for one  
388 RCT with high methodological quality and a large sample size applying EAT with  
389 horses but not in two other studies (one RCT and one NRT) with lower methodological  
390 quality and small sample sizes. For studies applying EAT with riding simulators, results  
391 varied. However, in addition to the unequal number of reports to compare, studies were  
392 highly heterogeneous in terms of study design, quality, and sample size.

393 Effects of EAT on gait were evaluated in five reports with horses and in five reports  
394 with riding simulators (see Fig. 4). Four studies each investigated also between-effects.  
395 Independent of the study design, for both horses and simulators, significant and non-  
396 significant effects on gait were detected. However, studies were highly heterogeneous  
397 similarly to the studies on balance. Furthermore, outcome measures were inconsistent  
398 between studies.

## 399 **Discussion**

### 400 ***Summary of results***

401 Taken together, this systematic literature review revealed 14 studies that evaluated  
402 the effect of EAT on health-related outcomes. While thirteen studies reported physical  
403 outcomes, seven studies reported further health-related outcomes. In general, the  
404 positive effects of EAT on stroke recovery could be identified in all the domains  
405 investigated, i.e., physical (balance, gait, postural control, lower extremity motor  
406 impairment, motor function, and ADL) and further outcomes (perceived recovery from  
407 stroke, and QoL, abdominal muscle thickness, trunk muscle activation). The most  
408 consistent and robust beneficial effects were identified on balance and gait.

### 409 ***Physical effects of EAT***

410 Although different aspects of physical effects of EAT were studied, most of the studies  
411 focused on investigating the effects of EAT on balance and/or gait.

412 Independent of the exact intervention, dose and study design, all eight studies  
413 investigating within-effects of EAT on balance, as measured by BBS, reported positive  
414 effects of EAT. Furthermore, in four out of seven studies assessing between-effects  
415 of EAT on balance (measured by BBS), significant improvements were reported.<sup>8,50–</sup>  
416 <sup>52</sup> BBS is a valid tool for assessing balance during stroke recovery with an excellent  
417 reliability.<sup>56</sup> It measures both the static and dynamic aspects of balance, i.e., to  
418 maintain balance either statically or during functional tasks.<sup>56</sup> The 14 items include  
419 tasks such as standing on one or two legs with eyes open and closed, sitting or  
420 standing up or sitting down.<sup>57</sup> This suggests a robust effect of EAT on general balance  
421 which has previously also been supported by a meta-analysis (albeit only including  
422 two studies).<sup>58</sup> In addition, positive findings were described for individual aspects of

423 balance, which were assessed by balance systems. However, these studies  
424 investigated different aspects of balance and were in general of low methodological  
425 quality. To conclude, EAT appears to have a positive effect on general balance,  
426 whereas the exact details require further consideration.

427 After stroke, gait issues are very common. Specifically, reduced walking speed and  
428 longer stance phase have been reported after stroke.<sup>59,60</sup> After EAT, walking speed  
429 (measured by different assessment tools) was consistently found to  
430 increase.<sup>8,40,42,45,49–51</sup> Moreover, these improvements were higher in the EG than in  
431 the CG in some studies.<sup>8,40,42,50,51</sup> This indicates a robust finding across different  
432 studies, independent of study design and quality. However, for other gait parameters,  
433 especially those investigated by Gait Analyzer, evidence is sparse, and conclusions  
434 are restricted due to limitations in study quality.

435 Taken together, there is considerable evidence for a positive effect of EAT on balance  
436 and gait. Recovery of gait parameters was reported as a major goal of stroke patients  
437 and is associated with quality of life.<sup>61</sup> In addition, recovery of gait and balance may  
438 decrease the risk of falling in stroke patients.<sup>60,62</sup> These findings support the promising  
439 potential of EAT as a multimodal intervention for recovery after stroke. In addition,  
440 preliminary evidence was provided for improved lower extremity motor impairment<sup>46</sup>  
441 and overall motor function after EAT<sup>40</sup>. However, to our knowledge, the effects of EAT  
442 on fine motor control or spasticity in stroke patients have yet to be evaluated. While  
443 fine motor control was not formally assessed, stroke patients reported subjectively  
444 improved fine motor skills during a semi-structured interview.<sup>53</sup> Moreover, temporary  
445 (lower extremity) spasticity was shown to decrease for patients with cerebral palsy<sup>10,63</sup>  
446 or spinal cord injury<sup>13,25</sup>. Even though the effects on upper extremity spasticity remain  
447 unclear, EAT may hold a promising potential for decreasing spasticity after stroke.

448 Future research should investigate both short- and long-term changes of upper and  
449 lower extremity spasticity, as well as changes in fine motor control.<sup>21,30</sup>

#### 450 ***Effects of EAT on further health-related outcomes***

451 Different further effects after EAT were investigated in stroke patients. However,  
452 evidence was sparse, and findings varied between studies. For example, EAT was  
453 found to have positive effects on perceived recovery from stroke and QoL.<sup>8,18</sup>  
454 Furthermore, the intervention (applied in horses) had a large emotional impact on the  
455 participants. For example, they reported higher self-esteem and increased self-  
456 efficacy.<sup>53</sup> Moreover, perceived recovery from stroke was associated with improved  
457 gait parameters, emphasizing the high subjective importance of gait recovery for  
458 stroke patients.<sup>41</sup>

459 The evidence for effects of EAT on depression was, however, inconclusive<sup>45,51</sup> While  
460 depression was shown to improve in one study<sup>64</sup>, it did not change on the other  
461 study<sup>45</sup>. In this pilot study, however, the dose of EAT was much lower than in the other  
462 studies (i.e., 8h of EAT<sup>45</sup> vs. 15h EAT<sup>64</sup>) Additionally, only eight patients were enrolled  
463 in this study. Moreover, the study that showed significant improvements of depression  
464 was of low methodological quality. The results might therefore be compromised by  
465 these constraints and require further consideration. In addition, no significant effects  
466 of EAT on cognitive aspects were observed. However, cognitive outcome was  
467 assessed in only one study.<sup>8</sup>

468 Moreover, it is important to understand the underlying physiological mechanisms of  
469 EAT to explain the findings and to predict and optimize EAT protocols. In this context,  
470 our systematic literature search revealed only two studies for stroke patients; these  
471 studies investigate muscle thickness and activity.<sup>14,43</sup> It was found that muscle activity

472 and thickness of the paretic side change after EAT which supports theories that EAT  
473 is training respective muscles.<sup>17,18</sup> However, it should be noted that study quality was  
474 low in both studies.

475 While these studies may help to explain physical changes, e.g., in gait or balance,  
476 other factors may shape our understanding of the mechanisms of action and should  
477 be investigated in future studies. In healthy, elderly people, for example, EAT led to  
478 hormonal changes, i.e., to a significant increase in serotonin and a decrease in cortisol  
479 levels.<sup>65</sup> In an autistic population, a decrease in the level of cortisol was detected in  
480 the course of EAT training.<sup>66</sup> In addition, an increase of progesterone levels over time  
481 was found.<sup>66</sup> Cortisol is a classical biomarker of stress and may thus reflect a lower  
482 level of stress after EAT.<sup>67</sup>

483 Moreover, preliminary investigations of brain physiology in this context have been  
484 made using EEG, fMRI, and NIRS.<sup>27,68–71</sup> In healthy elderly people, alpha power in the  
485 EEG increased during both riding a horse<sup>69</sup>, and a riding simulator.<sup>69,70</sup> Furthermore,  
486 one study used fMRI to assess changes in brain connectivity in children with ADHD.<sup>27</sup>  
487 Increased connectivity was detected both within the cerebellum (albeit not statistically  
488 higher than in the CG)<sup>72</sup> and from the cerebellum to other regions, i.e., to the right  
489 insular cortex, right middle temporal gyrus, left superior temporal gyrus, and right  
490 precentral gyrus<sup>27</sup>.

491 In addition, heart rate variability (HRV) in older adults increased after EAT when  
492 interacting with horses.<sup>73</sup> Interestingly, the subjects' HRV often synchronized with the  
493 horses' HRV, suggesting social bonding.<sup>73,74</sup>

494 Taken together, these findings suggest a positive effect of EAT on relaxation and  
495 increased concentration.<sup>67,69,73,74</sup> However, it remains unclear as to which specific

496 brain areas and networks are active and affected by EAT in stroke patients.  
497 Understanding the physiological mechanisms and clinical correlates of EAT may help  
498 to further optimize the therapy as well as to stratify patients who may benefit from it.<sup>75</sup>

#### 499 ***EAT applied with horses vs. riding simulator***

500 To assess the whole field, we included studies that applied EAT in both riding  
501 simulators and horses. These approaches have different advantages and  
502 disadvantages:

503 Although similar, riding simulators may not reflect movements comparable to those of  
504 a horse.<sup>76</sup> For example, some simulators apply only two-dimensional movements.<sup>44,76</sup>  
505 On the other hand, simulators offer the advantage of rhythmic movements without any  
506 deviation from the protocol compared to training with a real animal.<sup>44</sup> Riding simulators  
507 may also be more easily accessible and more affordable.<sup>76</sup> However, the emotional  
508 and psychological effects of the interaction with a horse should not be underestimated.  
509 Meaningful and positively stimulating training may increase the likelihood of  
510 improvement.<sup>53,77,78</sup> For example, stroke patients who underwent EAT for several  
511 weeks stressed the importance and strong effect of bonding with the horse during  
512 therapy.<sup>53</sup> This was also confirmed by HRV studies which found a favorable effect of  
513 EAT on HRV.<sup>67,73,74</sup>

514 Both horses and riding simulators seem to yield positive effects on balance and gait  
515 without favoring one over the other. Consequently, based on previous literature on  
516 equine-assisted therapy (EAT) after stroke, it is challenging to determine the  
517 superiority of one approach over the other. Additionally, investigating their impact on  
518 other factors would be of significant interest and should be explored in future studies.

519 Prior research suggests that the benefits of applying EAT in horses may outweigh  
520 those of riding simulators.<sup>44,76,79</sup> However, for introducing patients to the movements  
521 and training, using riding simulators could prove beneficial.

### 522 ***Study Quality***

523 The study quality assessment suggests low methodological quality for most studies.  
524 Risk of bias include inappropriate randomization in RCT, missing data, blinding and  
525 incomplete information about adherence to assigned intervention. Therefore, findings  
526 from previous research as well as the presented synthesis of the results cannot be  
527 generalized to all stroke patients and require further investigation.

528 However, although most current evidence is limited by methodological constraints,  
529 seven reports (based on five studies) were of considerable methodological quality.  
530 Four of them reported improved gait<sup>8,40,45,49</sup> and three of them improved balance<sup>8,45,49</sup>  
531 after EAT. Similar effects have been identified for EAT in children with cerebral  
532 palsy<sup>22,80</sup> which may have similarities to stroke patients. Therefore, synthesized results  
533 of this review, especially the effectiveness of EAT in boosting gait and balance after  
534 stroke, should not be disregarded but rather taken as a starting point for further  
535 investigation.

### 536 ***Limitations***

537 We are aware of multiple limitations regarding this systematic review. In general,  
538 previous evidence for the effects of EAT in stroke patients is sparse.

539 To comprehensively assess the entire field, our goal was to incorporate all studies  
540 related to Equine-Assisted Therapy (EAT) during stroke recovery. The term EAT  
541 encompasses various specific therapies involving horses,<sup>13,17</sup> such as those focusing  
542 on teaching riding skills, improving motor function, or providing psychotherapy.<sup>13</sup>



543 Importantly, inconsistent use of terms and often insufficiently detailed descriptions of  
544 interventions make it challenging to distinguish between their respective effects.  
545 Additionally, different interventions may exhibit variations in their effects.<sup>13,17</sup> We also  
546 included studies with diverse study designs.

547 Consequently, the included studies exhibited high heterogeneity in terms of study  
548 design, study quality, applied intervention (horses or simulators), intervention dosage,  
549 and control groups (see Table 1, Fig. 3 and 4). Due to this substantial heterogeneity,  
550 we were unable to draw overarching conclusions. To address this diversity, our  
551 approach was to synthesize the literature based on study design and whether the  
552 studies employed EAT with horses or riding simulators.

## 553 **Conclusion and future directions**

554 To conclude, EAT combines several important factors that may boost stroke  
555 rehabilitation of different symptoms. Specifically, this multimodal intervention consists  
556 of sensory, motor and cognitive components, offers high intensity training, and  
557 incorporates emotional and motivational aspects.<sup>8,12</sup>

558 While the benefits of EAT on recovery after stroke were identified in different domains,  
559 previous research is sparse and methodologically limited. This highlights the need of  
560 future research which should especially focus on systematically evaluating the effects  
561 of EAT on physical function including upper extremity motor function and spasticity, as  
562 well as on psychological factors. In addition, investigating physiological changes may  
563 help us to gain a better understanding of the underlying mechanisms and to further  
564 optimize future therapies.

565 **Authorship contribution statement**

566 BHT: Conceptualization, Methodology, Investigation, Formal Analysis, Visualization,  
567 Writing – Original Draft, AG: Conceptualization, Project administration, Funding  
568 acquisition, Writing – Review and Editing

569

570 **Declaration of competing interest**

571 The authors declare no conflict of interests.

572

573 **Acknowledgments**

574 This work was supported by the German Federal Ministry of Education and Research  
575 [BMBF 13GW0570, BEVARES]. We acknowledge support from the Open Access  
576 Publishing Fund of the University of Tuebingen. We thank Karolina Talar for valuable  
577 methodological input.

578

579 **Data availability**

580 The data that support the findings of this study are available for researchers from the  
581 first author upon reasonable request.

## 582 **References**

583 Achten D, Visser-Meily JMA, Post MWM, Schepers VPM. Life satisfaction of couples  
584 3 years after stroke. *Disabil Rehabil* 2012; 34: 1468–72.

585 Badin L, Alibrán É, Pothier K, Bailly N. Effects of equine-assisted interventions on older  
586 adults' health: A systematic review. *Int J Nurs Sci* 2022; 9: 542–52.

587 Baek IH, Kim BJ. The Effects of Horse Riding Simulation Training on Stroke Patients'  
588 Balance Ability and Abdominal Muscle Thickness Changes. *J Phys Ther Sci* 2014; 26:  
589 1293–6.

590 Baillet H, Leroy D, Verin E, Delpouve C, Benguigui N, Komar J, et al. Effect of  
591 Mechanical Horse Practice as New Postural Training in Patients With Neurological  
592 Disorders: A Pilot Study. *Front Psychol* 2019; 10: 1035.

593 Baldwin AL, Rector BK, Alden AC. Effects of a Form of Equine-Facilitated Learning on  
594 Heart Rate Variability, Immune Function, and Self-Esteem in Older Adults. *People  
595 Anim Int J Res Pract* 2018; 1: 5.

596 Baldwin AL, Rector BK, Alden AC. Physiological and Behavioral Benefits for People  
597 and Horses during Guided Interactions at an Assisted Living Residence. *Behav Sci  
598 (Basel)* 2021; 11

599 Beinotti F, Christofolletti G, Correia N, Borges G. Effects of horseback riding therapy  
600 on quality of life in patients post stroke. *Top Stroke Rehabil* 2013; 20: 226–32.

601 Beinotti F, Correia N, Christofolletti G, Borges G. Use of hippotherapy in gait training  
602 for hemiparetic post-stroke. *Arq Neuropsiquiatr* 2010; 68: 908–13.

603 Berg K, Wood-Dauphinee S, Williams JI, Gayton D. Measuring balance in the elderly:  
604 Preliminary development of an instrument. *Physiother Canada* 1989; 41: 304–11.

- 605 Beyaert C, Vasa R, Frykberg GE. Gait post-stroke: Pathophysiology and rehabilitation  
606 strategies. *Neurophysiol Clin* 2015; 45: 335–55.
- 607 Blum L, Korner-Bitensky N. Usefulness of the Berg Balance Scale in stroke  
608 rehabilitation: A systematic review. *Phys Ther* 2008; 88: 559–66.
- 609 Brewer L, Horgan F, Hickey A, Williams D. Stroke rehabilitation: Recent advances and  
610 future therapies. *Qjm* 2013; 106: 11–25.
- 611 Bunketorp-Käll L, Lundgren-Nilsson Å, Nilsson M, Blomstrand C. Multimodal  
612 rehabilitation in the late phase after stroke enhances the life situation of informal  
613 caregivers. *Top Stroke Rehabil* 2017
- 614 Bunketorp-Käll L, Lundgren-Nilsson Å, Samuelsson H, Pekny T, Blomvé K, Pekna M,  
615 et al. Long-Term Improvements after Multimodal Rehabilitation in Late Phase after  
616 Stroke. *Stroke* 2017; 48: 1916–24.
- 617 Bunketorp-Käll L, Pekna M, Pekny M, Blomstrand C, Nilsson M, Bunketorp-Kall L, et  
618 al. Effects of horse-riding therapy and rhythm and music-based therapy on functional  
619 mobility in late phase after stroke. *NeuroRehabilitation* 2019; 45: 483–92.
- 620 Bunketorp-Käll L, Pekna M, Pekny M, Samuelsson H, Blomstrand C, Nilsson M. Motor  
621 Function in the Late Phase After Stroke: Stroke Survivors' Perspective. *Ann Rehabil*  
622 *Med* 2020; 44: 362–9.
- 623 Byzova A, Roozbahani H, Handroos H, Hakansson N, Lankarani HM. Monitoring of the  
624 human body and brain behavior using optical motion capture system and EEG utilizing  
625 horseback riding simulator: an extended case study. *J Phys Ther Sci* 2020; 32: 85–91.
- 626 Campbell M, McKenzie JE, Sowden A, Katikireddi SV, Brennan SE, Ellis S, et al.  
627 Synthesis without meta-analysis (SWiM) in systematic reviews: Reporting guideline.

628 BMJ 2020; 368: 1–6.

629 Cassidy JM, Cramer SC. Spontaneous and Therapeutic-Induced Mechanisms of  
630 Functional Recovery After Stroke. *Transl Stroke Res* 2017; 8: 33–46.

631 Cho SH. Effects of horseback riding exercise on the relative alpha power spectrum in  
632 the elderly. *Arch Gerontol Geriatr* 2017; 70: 141–7.

633 Cho SH, Kim JW, Kim SR, Cho BJ. Effects of horseback riding exercise therapy on  
634 hormone levels in elderly persons. *J Phys Ther Sci* 2015; 27: 2271–3.

635 Cho W-S, Cho S-H. Effects of Mechanical Horseback Riding Exercise on Static  
636 Balance of Patient with Chronic Stroke. *J Korea Acad Coop Soc* 2015; 16: 1981–8.

637 Collado-Mateo D, Lavín-Pérez AM, García JPF, García-Gordillo MÁ, Villafaina S.  
638 Effects of Equine-Assisted Therapies or Horse-Riding Simulators on Chronic Pain: A  
639 Systematic Review and Meta-Analysis. *Medicina (B Aires)* 2020; 56: 444.

640 Deutz U, Heussen N, Weigt-Usinger K, Leiz S, Raabe C, Polster T, et al. Impact of  
641 Hippotherapy on Gross Motor Function and Quality of Life in Children with Bilateral  
642 Cerebral Palsy: A Randomized Open-Label Crossover Study. *Neuropediatrics* 2018;  
643 49: 185–92.

644 Dobkin BH. Rehabilitation after stroke. *N Engl J Med* 2005 2005; 352: 1677–1684.

645 Dominguez-Romero JG, Molina-Aroca A, Moral-Munoz JA, Luque-Moreno C, Lucena-  
646 Anton D. Effectiveness of mechanical horse-riding simulators on postural balance in  
647 neurological rehabilitation: Systematic review and meta-analysis. *Int J Environ Res*  
648 *Public Health* 2020; 17

649 Feigin V, Krishnamurthi R, Parmar P, Norrving B, Mensah G, Bennett D, et al. Update  
650 on the Global Burden of Ischaemic and Haemorrhagic Stroke in 1990–2013: The GBD

- 651 2013 Study. *Neuroepidemiology* 2015; 45: 161–76.
- 652 Feigin VL, Brainin M, Norrving B, Martins S, Sacco RL, Hacke W, et al. World Stroke  
653 Organization (WSO): Global Stroke Fact Sheet 2022. *Int J Stroke* 2022; 17: 18–29.
- 654 Funakoshi R, Masuda K, Uchiyama H, Ohta M. A possible mechanism of horseback  
655 riding on dynamic trunk alignment. *Heliyon* 2018; 4: e00777.
- 656 García-Gómez A, Guerrero-Barona E, García-Peña I, Rodríguez-Jiménez M, Moreno-  
657 Manso JM. Equine-assisted therapeutic activities and their influence on the heart rate  
658 variability: A systematic review. *Complement Ther Clin Pract* 2020; 39: 101167.
- 659 Garner BA, Rigby BR. Human pelvis motions when walking and when riding a  
660 therapeutic horse. *Hum Mov Sci* 2015; 39: 121–37.
- 661 Goulet-Pelletier J-C, Cousineau D. A review of effect sizes and their confidence  
662 intervals, Part I: The Cohen's d family. *Quant Methods Psychol* 2020; 16: 422–3.
- 663 Grefkes C, Ward NS. Cortical reorganization after stroke: How much and how  
664 functional? *Neuroscientist* 2014; 20: 56–70.
- 665 Guindos-Sanchez L De, Lucena-Anton D, Moral-Munoz JA, Salazar A, Carmona-  
666 Barrientos I. The effectiveness of hippotherapy to recover gross motor function in  
667 children with cerebral palsy: A systematic review and meta-analysis. *Children* 2020; 7:  
668 106.
- 669 Han JY, Kim JM, Kim SK, Chung JS, Lee H-CC, Lim JK, et al. Therapeutic effects of  
670 mechanical horseback riding on gait and balance ability in stroke patients. *Ann Rehabil*  
671 *Med* 2012; 36: 762–9.
- 672 Heussen N, Häusler M. Equine-Assisted Therapies for Children With Cerebral Palsy:  
673 A Meta-analysis. *Pediatrics* 2022; 150: e2021055229.

- 674 Hong QN, Fàbregues S, Bartlett G, Boardman F, Cargo M, Dagenais P, et al. The  
675 Mixed Methods Appraisal Tool (MMAT) version 2018 for information professionals and  
676 researchers. *Educ Inf* 2018; 34: 285–91.
- 677 Hyun C, Kim K, Lee S, Ko N, Lee IS, Koh SE. The Short-term Effects of Hippotherapy  
678 and Therapeutic Horseback Riding on Spasticity in Children with Cerebral Palsy: A  
679 Meta-analysis. *Pediatr Phys Ther* 2022; 34: 172–8.
- 680 Hyun GJ, Jung TW, Park JH, Kang KD, Kim SM, Son YD, et al. Changes in Gait  
681 Balance and Brain Connectivity in Response to Equine-Assisted Activity and Training  
682 in Children with Attention Deficit Hyperactivity Disorder. *J Altern Complement Med*  
683 2016; 22: 286–93.
- 684 Kim H, Her JG, Ko J. Effect of horseback riding simulation machine training on trunk  
685 balance and gait of chronic stroke patients. *J Phys Ther Sci* 2014; 26: 29–32.
- 686 Kim HS, Lee CW, Lee IS. Comparison between the Effects of Horseback Riding  
687 Exercise and Trunk Stability Exercise on the Balance of Normal Adults. *J Phys Ther*  
688 *Sci* 2014; 26: 1325–7.
- 689 Kim P, Warren S, Madill H, Hadley M. Quality of life of stroke survivors. *Int J Ther*  
690 *Rehabil* 1999; 12: 43.
- 691 Kim SR, Cho SH, Kim JW, Lee H-C, Brienen M, Cho BJ. Effects of horseback riding  
692 exercise therapy on background electroencephalograms of elderly people. *J Phys Ther*  
693 *Sci* 2015; 27: 2373–2376.
- 694 Kim YN, Lee DK. Effects of horse-riding exercise on balance, gait, and activities of  
695 daily living in stroke patients. *J Phys Ther Sci* 2015; 27: 607–9.
- 696 Kleim JA, Jones TA. Principles of experience-dependent neural plasticity: Implications



- 697 for rehabilitation after brain damage. *J Speech, Lang Hear Res* 2008; 51: 225–39.
- 698 Krakauer JW, Carmichael ST, Corbett D, Wittenberg GF. Getting neurorehabilitation  
699 right: What can be learned from animal models? *Neurorehabil Neural Repair* 2012; 26:  
700 923–31.
- 701 Lechner HE, Kakebeeke TH, Hegemann D, Baumberger M. The Effect of Hippotherapy  
702 on Spasticity and on Mental Well-Being of Persons With Spinal Cord Injury. *Arch Phys  
703 Med Rehabil* 2007; 88: 1241–8.
- 704 Lee C-W, Kim SG, Yong MS. Effects of Hippotherapy on Recovery of Gait and Balance  
705 Ability in Patients with Stroke. *J Phys Ther Sci* 2014; 26: 309–311.
- 706 Lee D, Lee S, Park J. Effects of Indoor Horseback Riding and Virtual Reality Exercises  
707 on the Dynamic Balance Ability of Normal Healthy Adults. *J Phys Ther Sci* 2014; 26:  
708 1903–5.
- 709 Lee DK, Kim EK. The influence of horseback riding training on the physical function  
710 and psychological problems of stroke patients. *J Phys Ther Sci* 2015; 27: 2739–41.
- 711 Lee JW, Han A, Kim K. Effects of rehabilitative horse riding on the Sit-to-Stand action  
712 of the adolescent with brain lesions. *J Exerc Rehabil* 2014; 10: 31–4.
- 713 Lee N, Park S, Kim J. Effects of hippotherapy on brain function, BDNF level, and  
714 physical fitness in children with ADHD. *J Exerc Nutr Biochem* 2015; 6: 115–21.
- 715 Lee N, Park S, Kim J. Hippotherapy and neurofeedback training effect on the brain  
716 function and serum brain-derived neurotrophic factor level changes in children with  
717 attention-deficit or/and hyperactivity disorder. *J Exerc Nutr Biochem* 2017; 21: 35–42.
- 718 Lewis SW. Equine-assisted therapies using horses as healers : A concept analysis.  
719 *Nurs Open* 2020; 7: 58–67.

- 720 Lohse KR, Lang CE, Boyd LA. Is more better? Using meta-data to explore dose-  
721 response relationships in stroke rehabilitation. *Stroke* 2014; 45: 2053–8.
- 722 McGibbon NH, Benda W, Duncan BR, Silkwood-Sherer D. Immediate and Long-Term  
723 Effects of Hippotherapy on Symmetry of Adductor Muscle Activity and Functional  
724 Ability in Children With Spastic Cerebral Palsy. *Arch Phys Med Rehabil* 2009; 90: 966–  
725 74.
- 726 de Mello EC, Diniz LH, Lage JB, Ribeiro MF, Bevilacqua Junior DE, Rosa RC, et al.  
727 Analysis of Trunk Neuromuscular Activation During Equine-Assisted Therapy in Older  
728 Adults. *Percept Mot Skills* 2022; 129: 1458–76.
- 729 Minet LR, Peterson E, Von Koch L, Ytterberg C. Occurrence and Predictors of Falls in  
730 People with Stroke: Six-Year Prospective Study. *Stroke* 2015; 46: 2688–90.
- 731 Murphy TH, Corbett D. Plasticity during stroke recovery: From synapse to behaviour.  
732 *Nat Rev Neurosci* 2009; 10: 861–72.
- 733 Olney SJ, Richards CL. Hemiparetic gait following stroke . Part I : Characteristics. *Gait*  
734 *Posture* 1996; 4: 136–48.
- 735 Ottiger B, Van Wegen E, Keller K, Nef T, Nyffeler T, Kwakkel G, et al. Getting into a  
736 “Flow” state: a systematic review of flow experience in neurological diseases. *J*  
737 *Neuroeng Rehabil* 2021; 18: 1–21.
- 738 Page MJ, McKenzie JE, Bossuyt PM, Boutron I, Hoffmann TC, Mulrow CD, et al. The  
739 PRISMA 2020 statement: An updated guideline for reporting systematic reviews. *Int J*  
740 *Surg* 2021; 88: 105906.
- 741 Park J, Lee S, Lee J, Lee D. The effects of horseback riding simulator exercise on  
742 postural balance of chronic stroke patients. *J Phys Ther Sci* 2013; 25: 1169–72.

- 743 Park JH, Shurtleff T, Engsborg J, Rafferty S, You JY, You IY, et al. Comparison  
744 between the robo-horse and real horse movements for hippotherapy. *Biomed Mater*  
745 *Eng* 2014; 24: 2603–10.
- 746 Pekna M, Pekny M, Nilsson M. Modulation of Neural Plasticity as a Basis for Stroke  
747 Rehabilitation. 2012: 2819–28.
- 748 Pohl P, Carlsson G, Bunketorp Käll L, Nilsson M, Blomstrand C. A qualitative  
749 exploration of post-acute stroke participants' experiences of a multimodal intervention  
750 incorporating horseback riding. *PLoS One* 2018; 13: 1–18.
- 751 Portaro S, Cacciola A, Naro A, Cavallaro F, Gemelli G, Aliberti B, et al. Can Individuals  
752 with Down Syndrome Benefit from Hippotherapy? An Exploratory Study on Gait and  
753 Balance. *Dev Neurorehabil* 2020; 23: 337–42.
- 754 Rigby BR, Grandjean PW. The Efficacy of Equine-Assisted Activities and Therapies  
755 on Improving Physical Function. *J Altern Complement Med* 2016; 22: 9–24.
- 756 Solomonow-Avnon D, Mawase F. The dose and intensity matter for chronic stroke. *J*  
757 *Neurol Neurosurg Psychiatry* 2019; 90: 1187–8.
- 758 Stergiou A, Tzoufi M, Ntzani E, Varvarousis D, Beris A, Ploumis A. Therapeutic Effects  
759 of Horseback Riding Interventions: A Systematic Review and Meta-analysis. *Am J*  
760 *Phys Med Rehabil* 2017; 96: 717–25.
- 761 Sung YH, Kim CJ, Yu BK, Kim KM. A hippotherapy simulator is effective to shift weight  
762 bearing toward the affected side during gait in patients with stroke. *NeuroRehabilitation*  
763 2013; 33: 407–12.
- 764 Sunwoo H, Chang WH, Kwon J-Y, Kim T-W, Lee J-Y, Kim Y-H. Hippotherapy in Adult  
765 Patients with Chronic Brain Disorders : A Pilot Study. *Ann Rehabil Med* 2012; 2012;

766 36: 756–61.

767 Tabares C, Vicente F, Sánchez S, Aparicio A, Alejo S, Cubero J. Quantification of  
768 hormonal changes by effects of hippotherapy in the autistic population. *Neurochem J*  
769 2012; 6: 311–6.

770 Uchiyama H, Ohtani N, Ohta M. Three-dimensional analysis of horse and human gaits  
771 in therapeutic riding. *Appl Anim Behav Sci* 2011; 135: 271–6.

772 Viruega H, Galy C, Loriette C, Jacquot S, Houpeau JL, Gaviria M. Breast Cancer: How  
773 Hippotherapy Bridges the Gap between Healing and Recovery—A Randomized  
774 Controlled Clinical Trial. *Cancers (Basel)* 2023; 15: 1317.

775 Viruega H, Imbernon C, Chausson N, Altarcha T, Aghasaryan M, Soumah D, et al.  
776 Neurorehabilitation through Hippotherapy on Neurofunctional Sequels of Stroke: Effect  
777 on Patients' Functional Independence, Sensorimotor/Cognitive Capacities and Quality  
778 of Life, and the Quality of Life of Their Caregivers—A Study Protocol. *Brain Sci* 2022;  
779 12: 619.

780 Vive S, Bunketorp-käll L, Carlsson G. Experience of enriched rehabilitation in the  
781 chronic phase of stroke. *Disabil Rehabil* 2022; 44: 412–9.

782 Ward J, Hovey A, Brownlee K. Mental health benefits of mounted equine-assisted  
783 therapies: A scoping review. *Heal Soc Care Community* 2022: 1–16.

784 Ward NS, Brander F, Kelly K. Intensive upper limb neurorehabilitation in chronic stroke:  
785 Outcomes from the Queen Square programme. *J Neurol Neurosurg Psychiatry* 2019;  
786 90: 498–506.

787 Yoo JH, Oh Y, Jang B, Song J, Kim J, Kim S, et al. The effects of equine-assisted  
788 activities and therapy on resting-state brain function in attention-deficit/hyperactivity

789 disorder: A pilot study. *Clin Psychopharmacol Neurosci* 2016; 14: 357–64.

790 Zadnikar M, Kastrin A. Effects of hippotherapy and therapeutic horseback riding on

791 postural control or balance in children with cerebral palsy: A meta-analysis. *Dev Med*

792 *Child Neurol* 2011; 53: 684–91.
